# Supplementary material
Source: PubMed Central journal article supplement (PMC2859318)

# Supplemental Figure 1:

## MCF10A

N=2

N=3

Uncoated

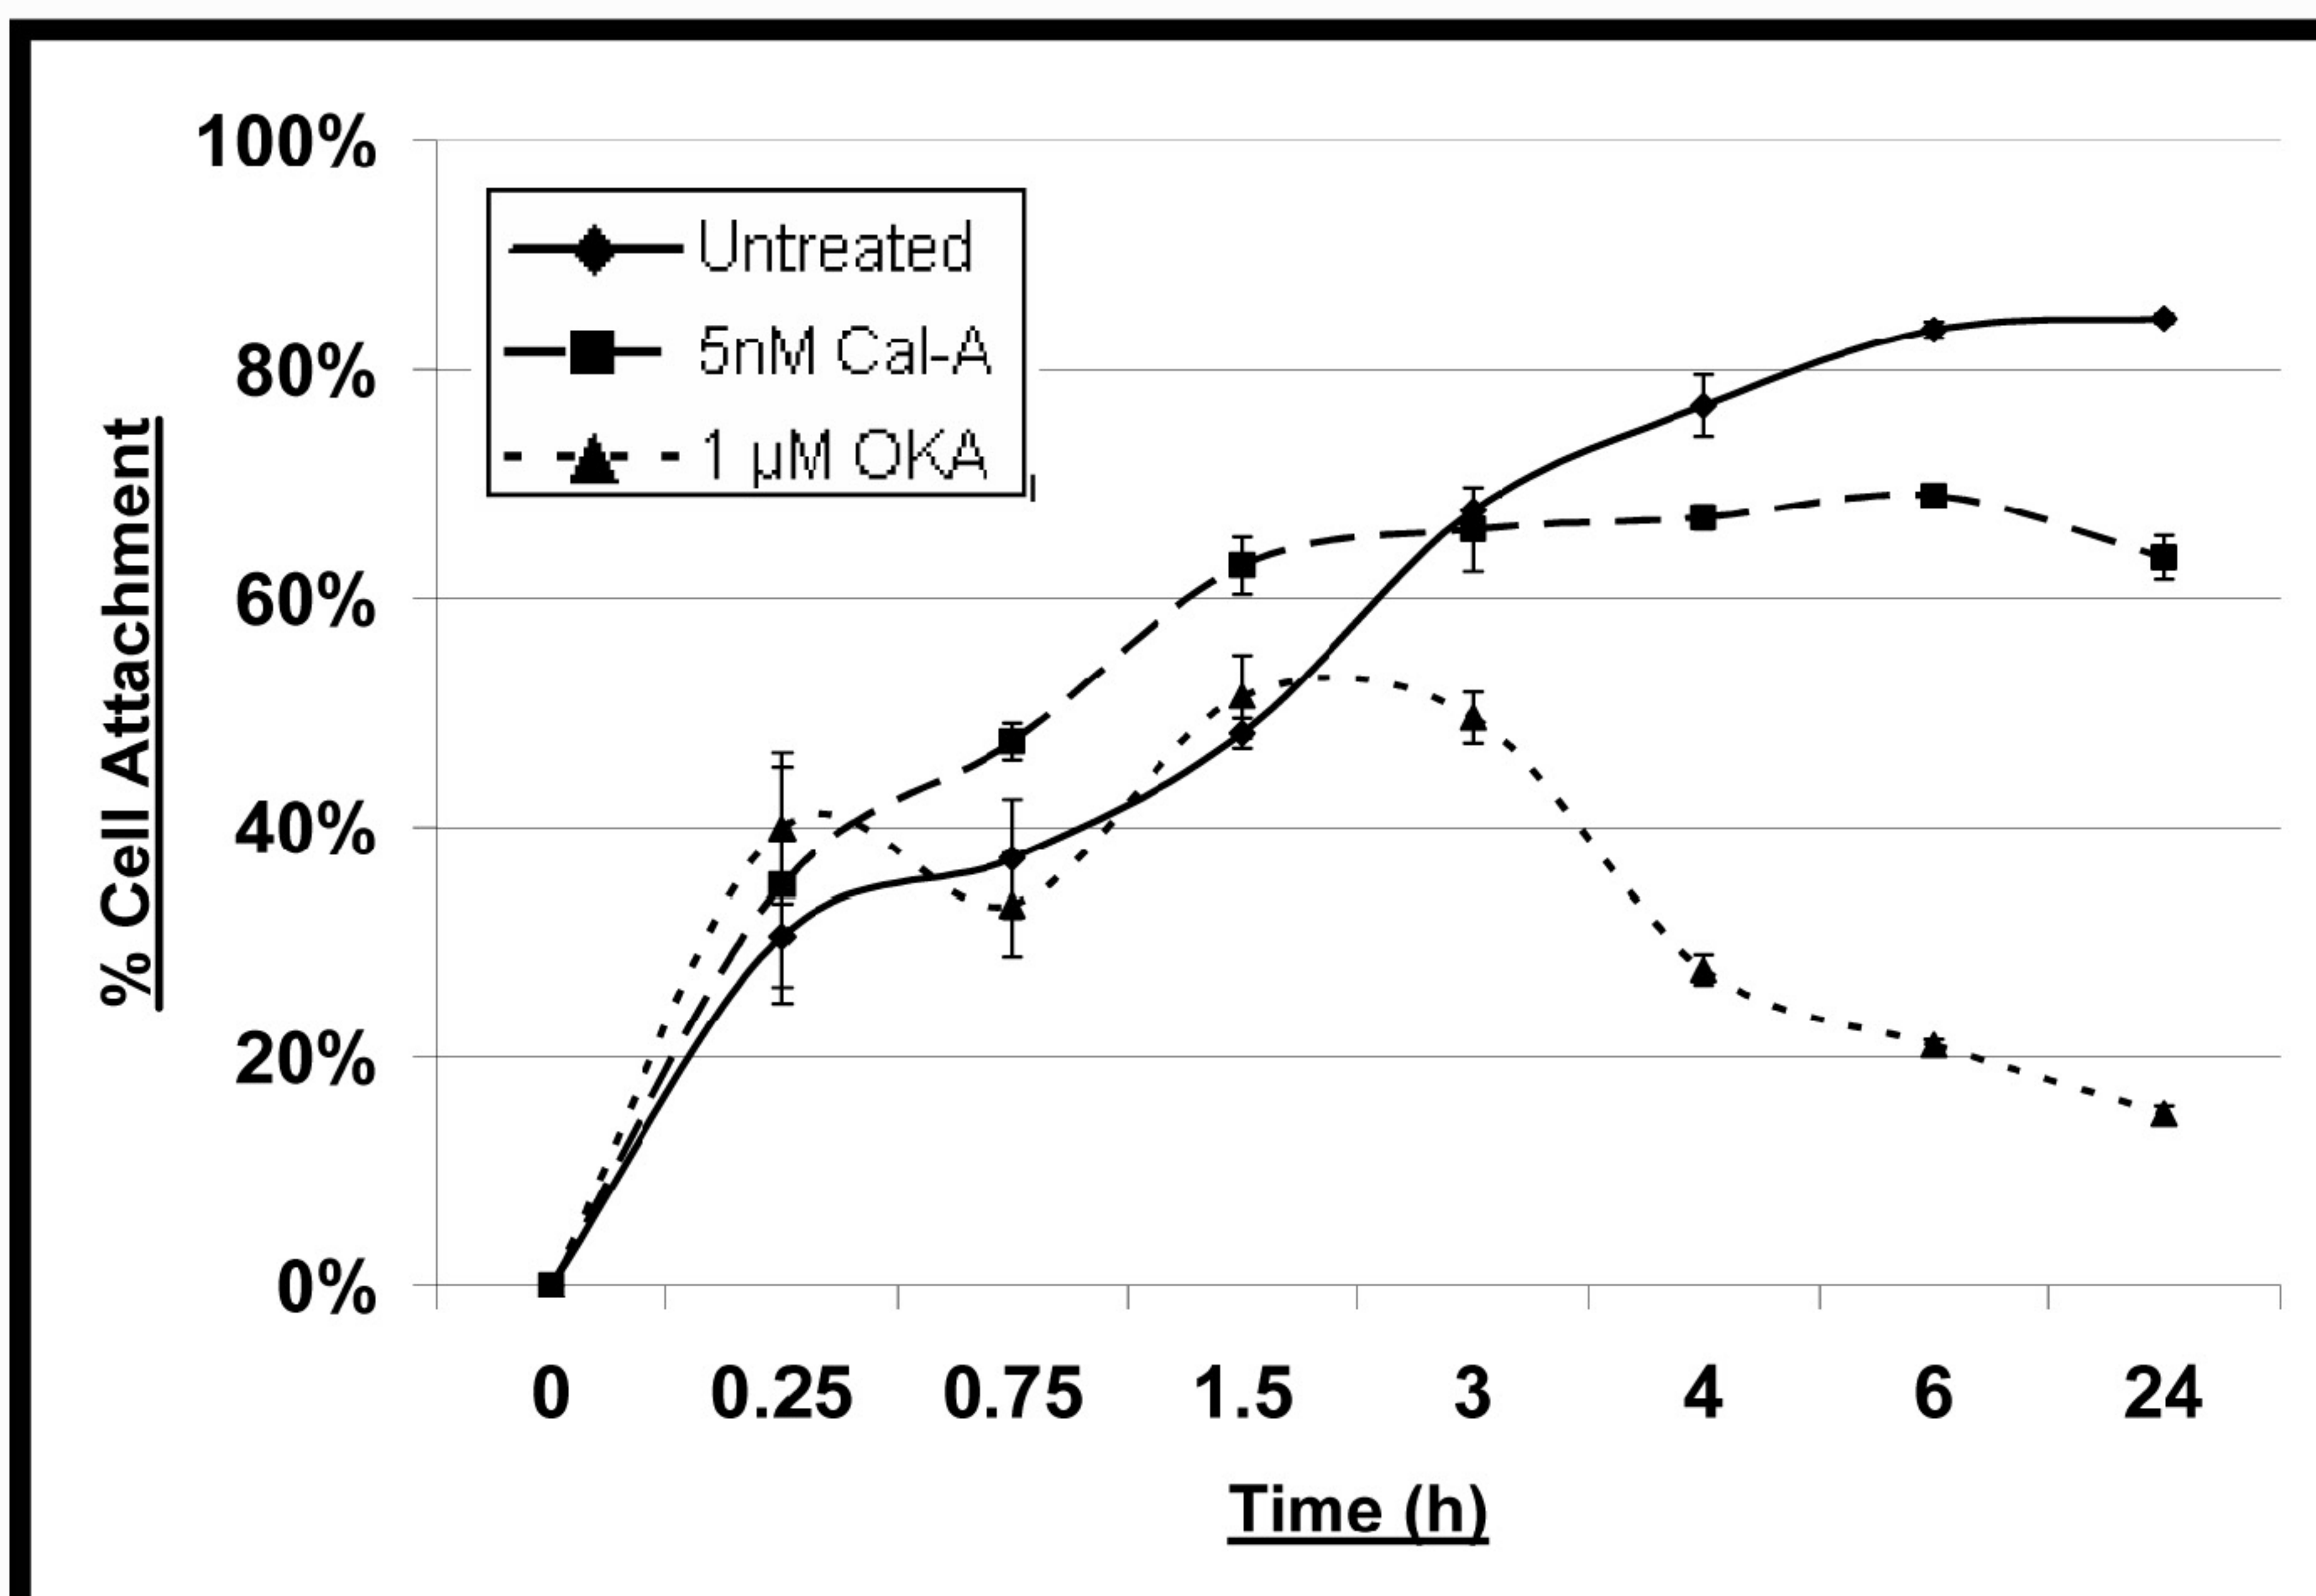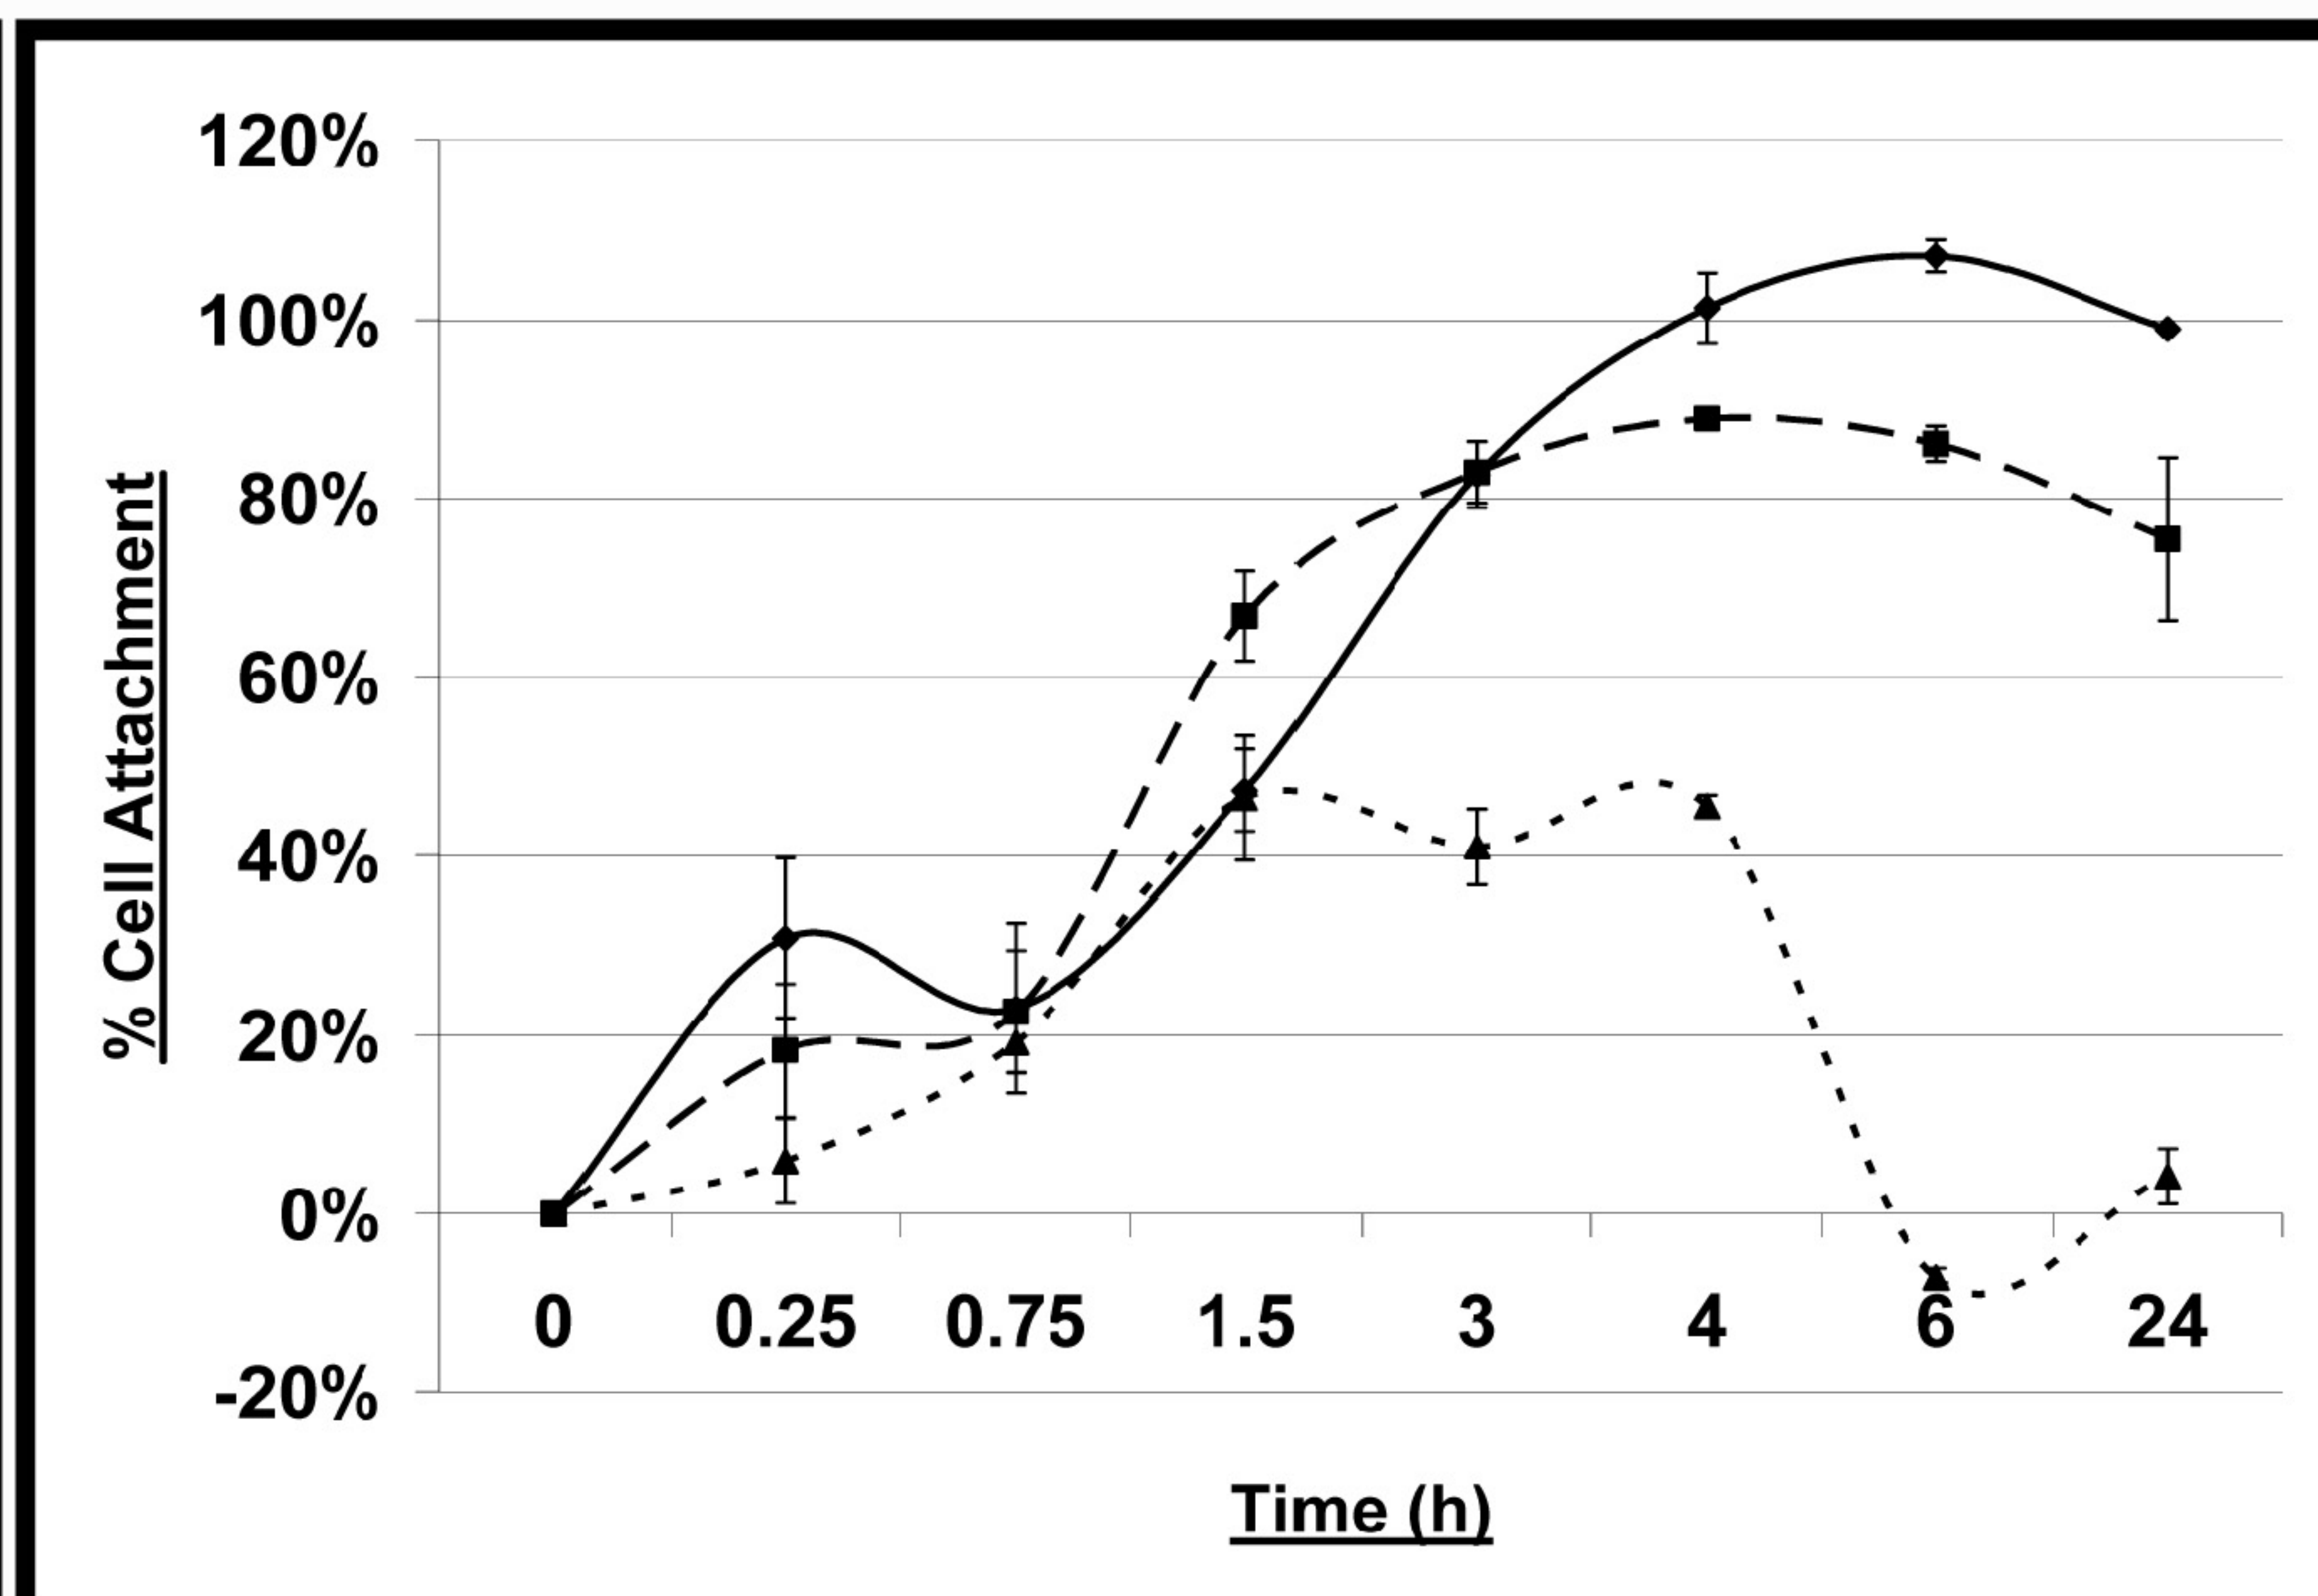

Laminin

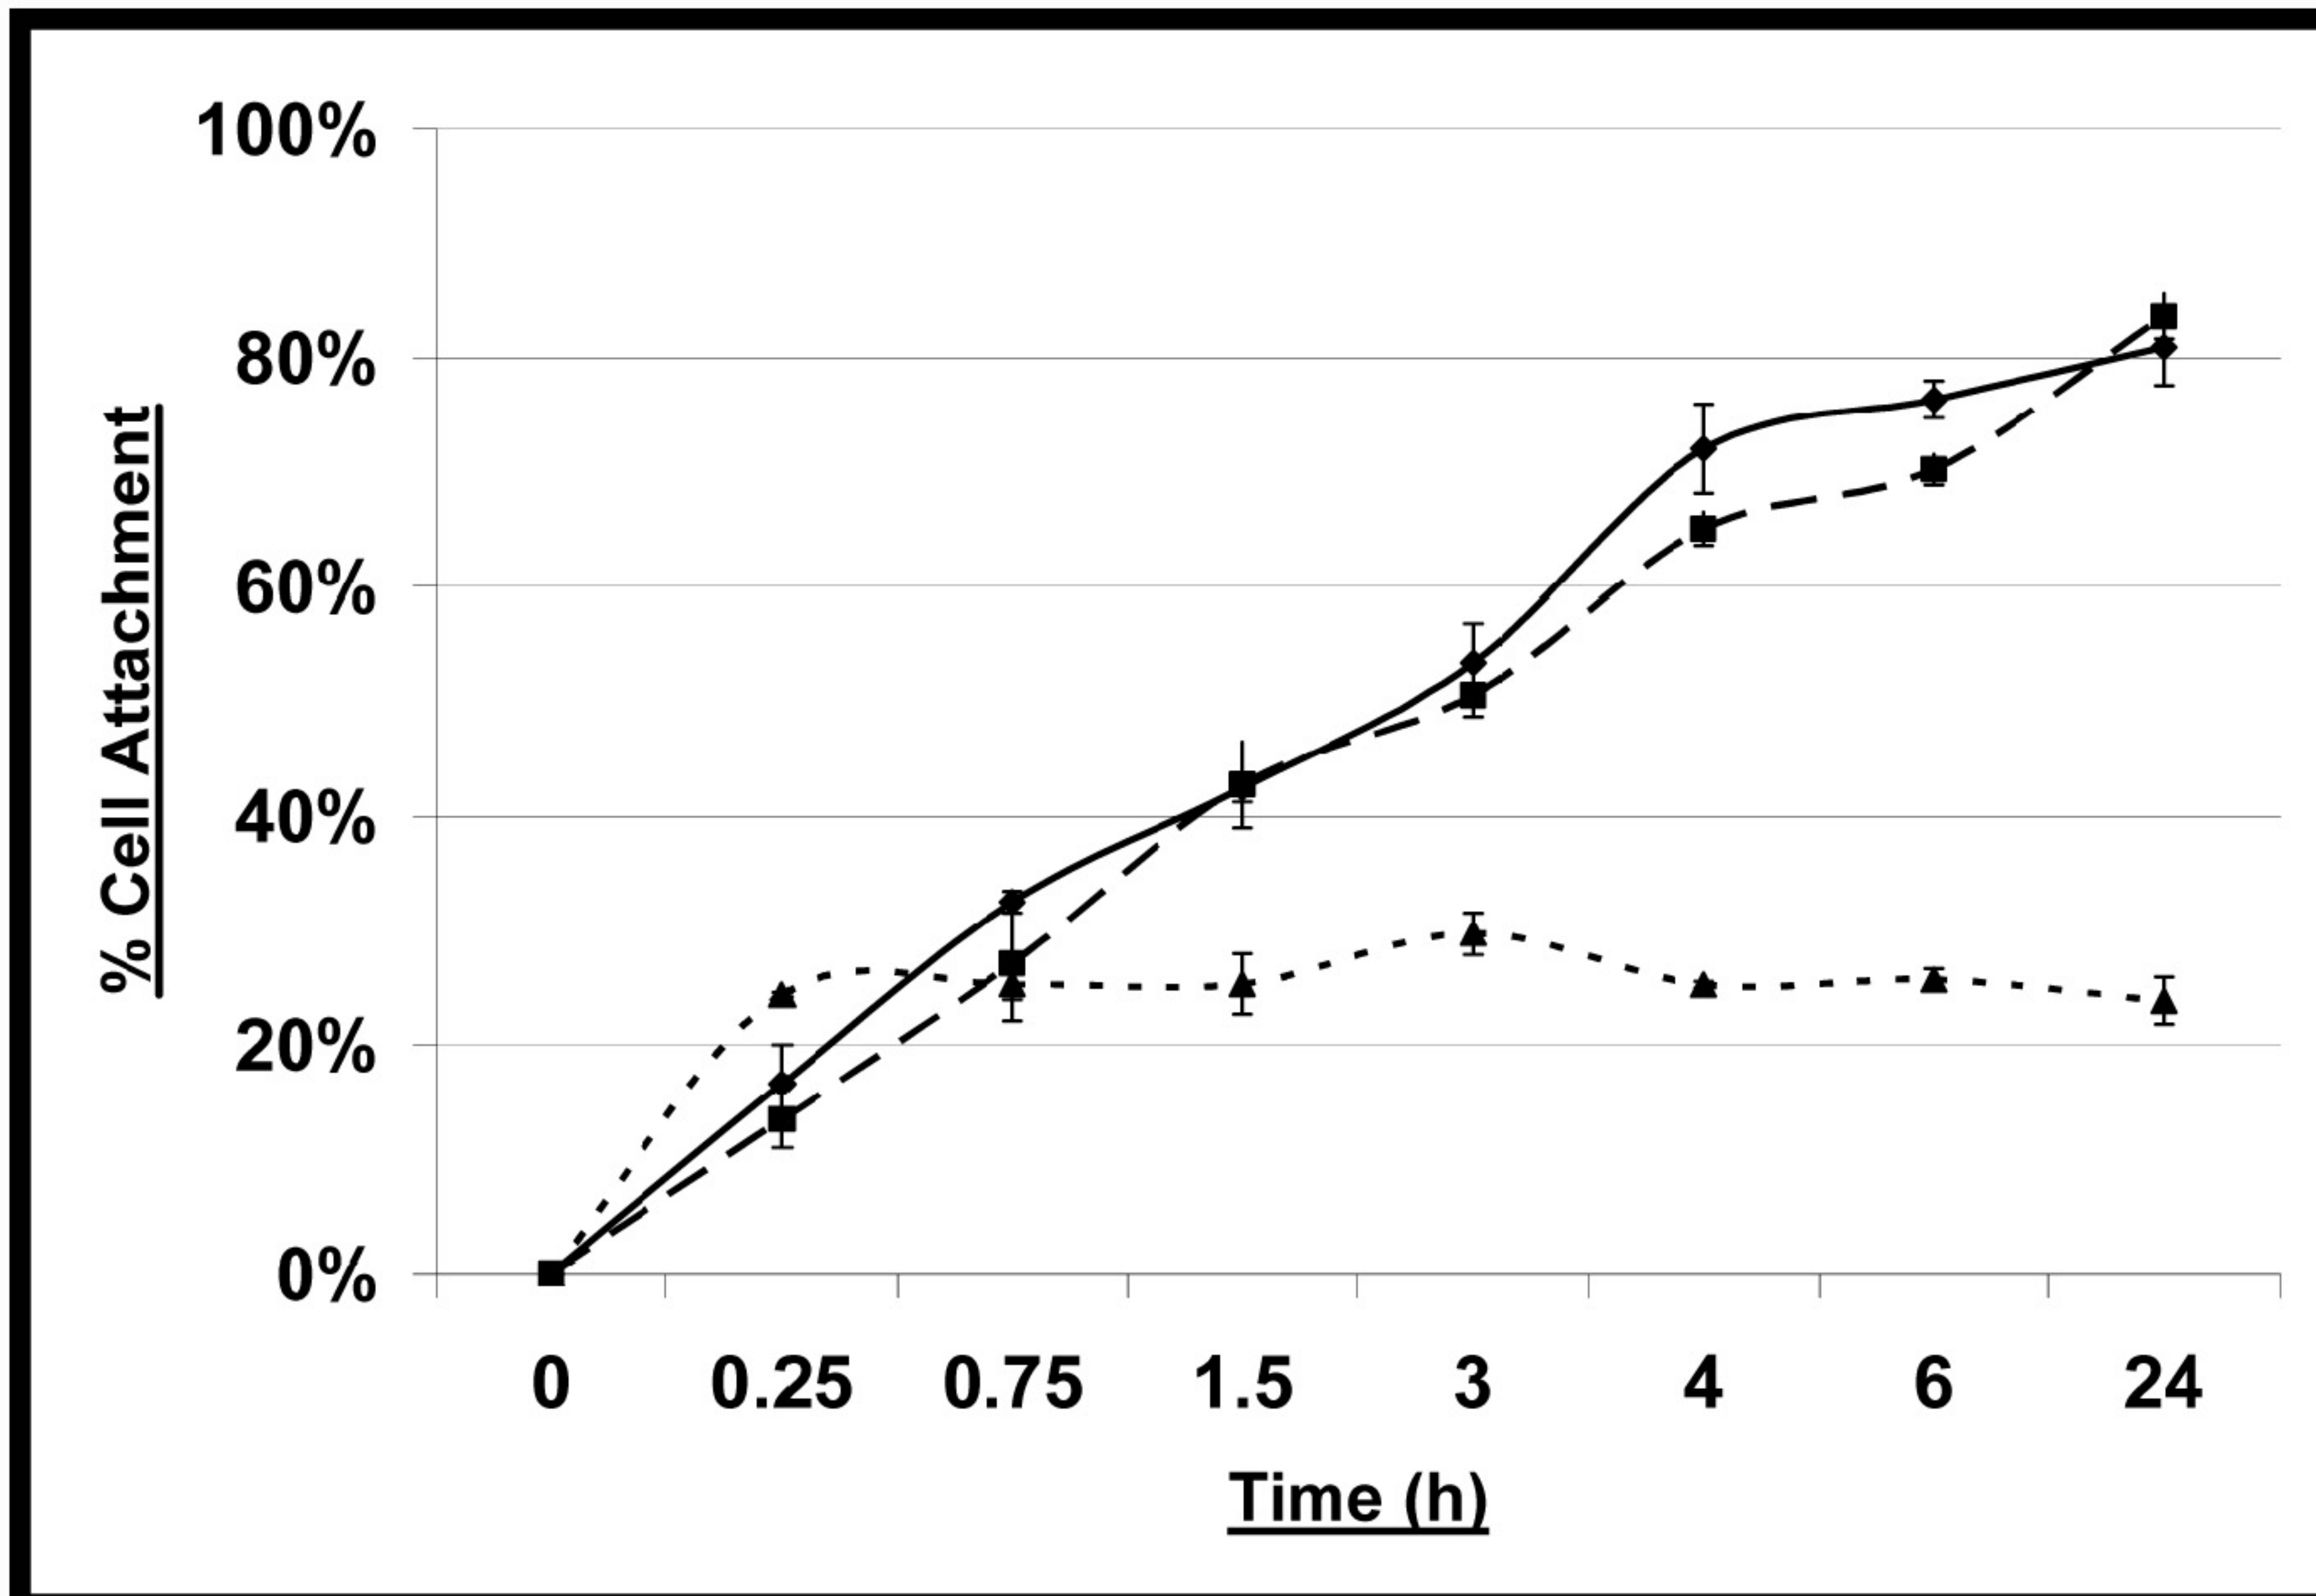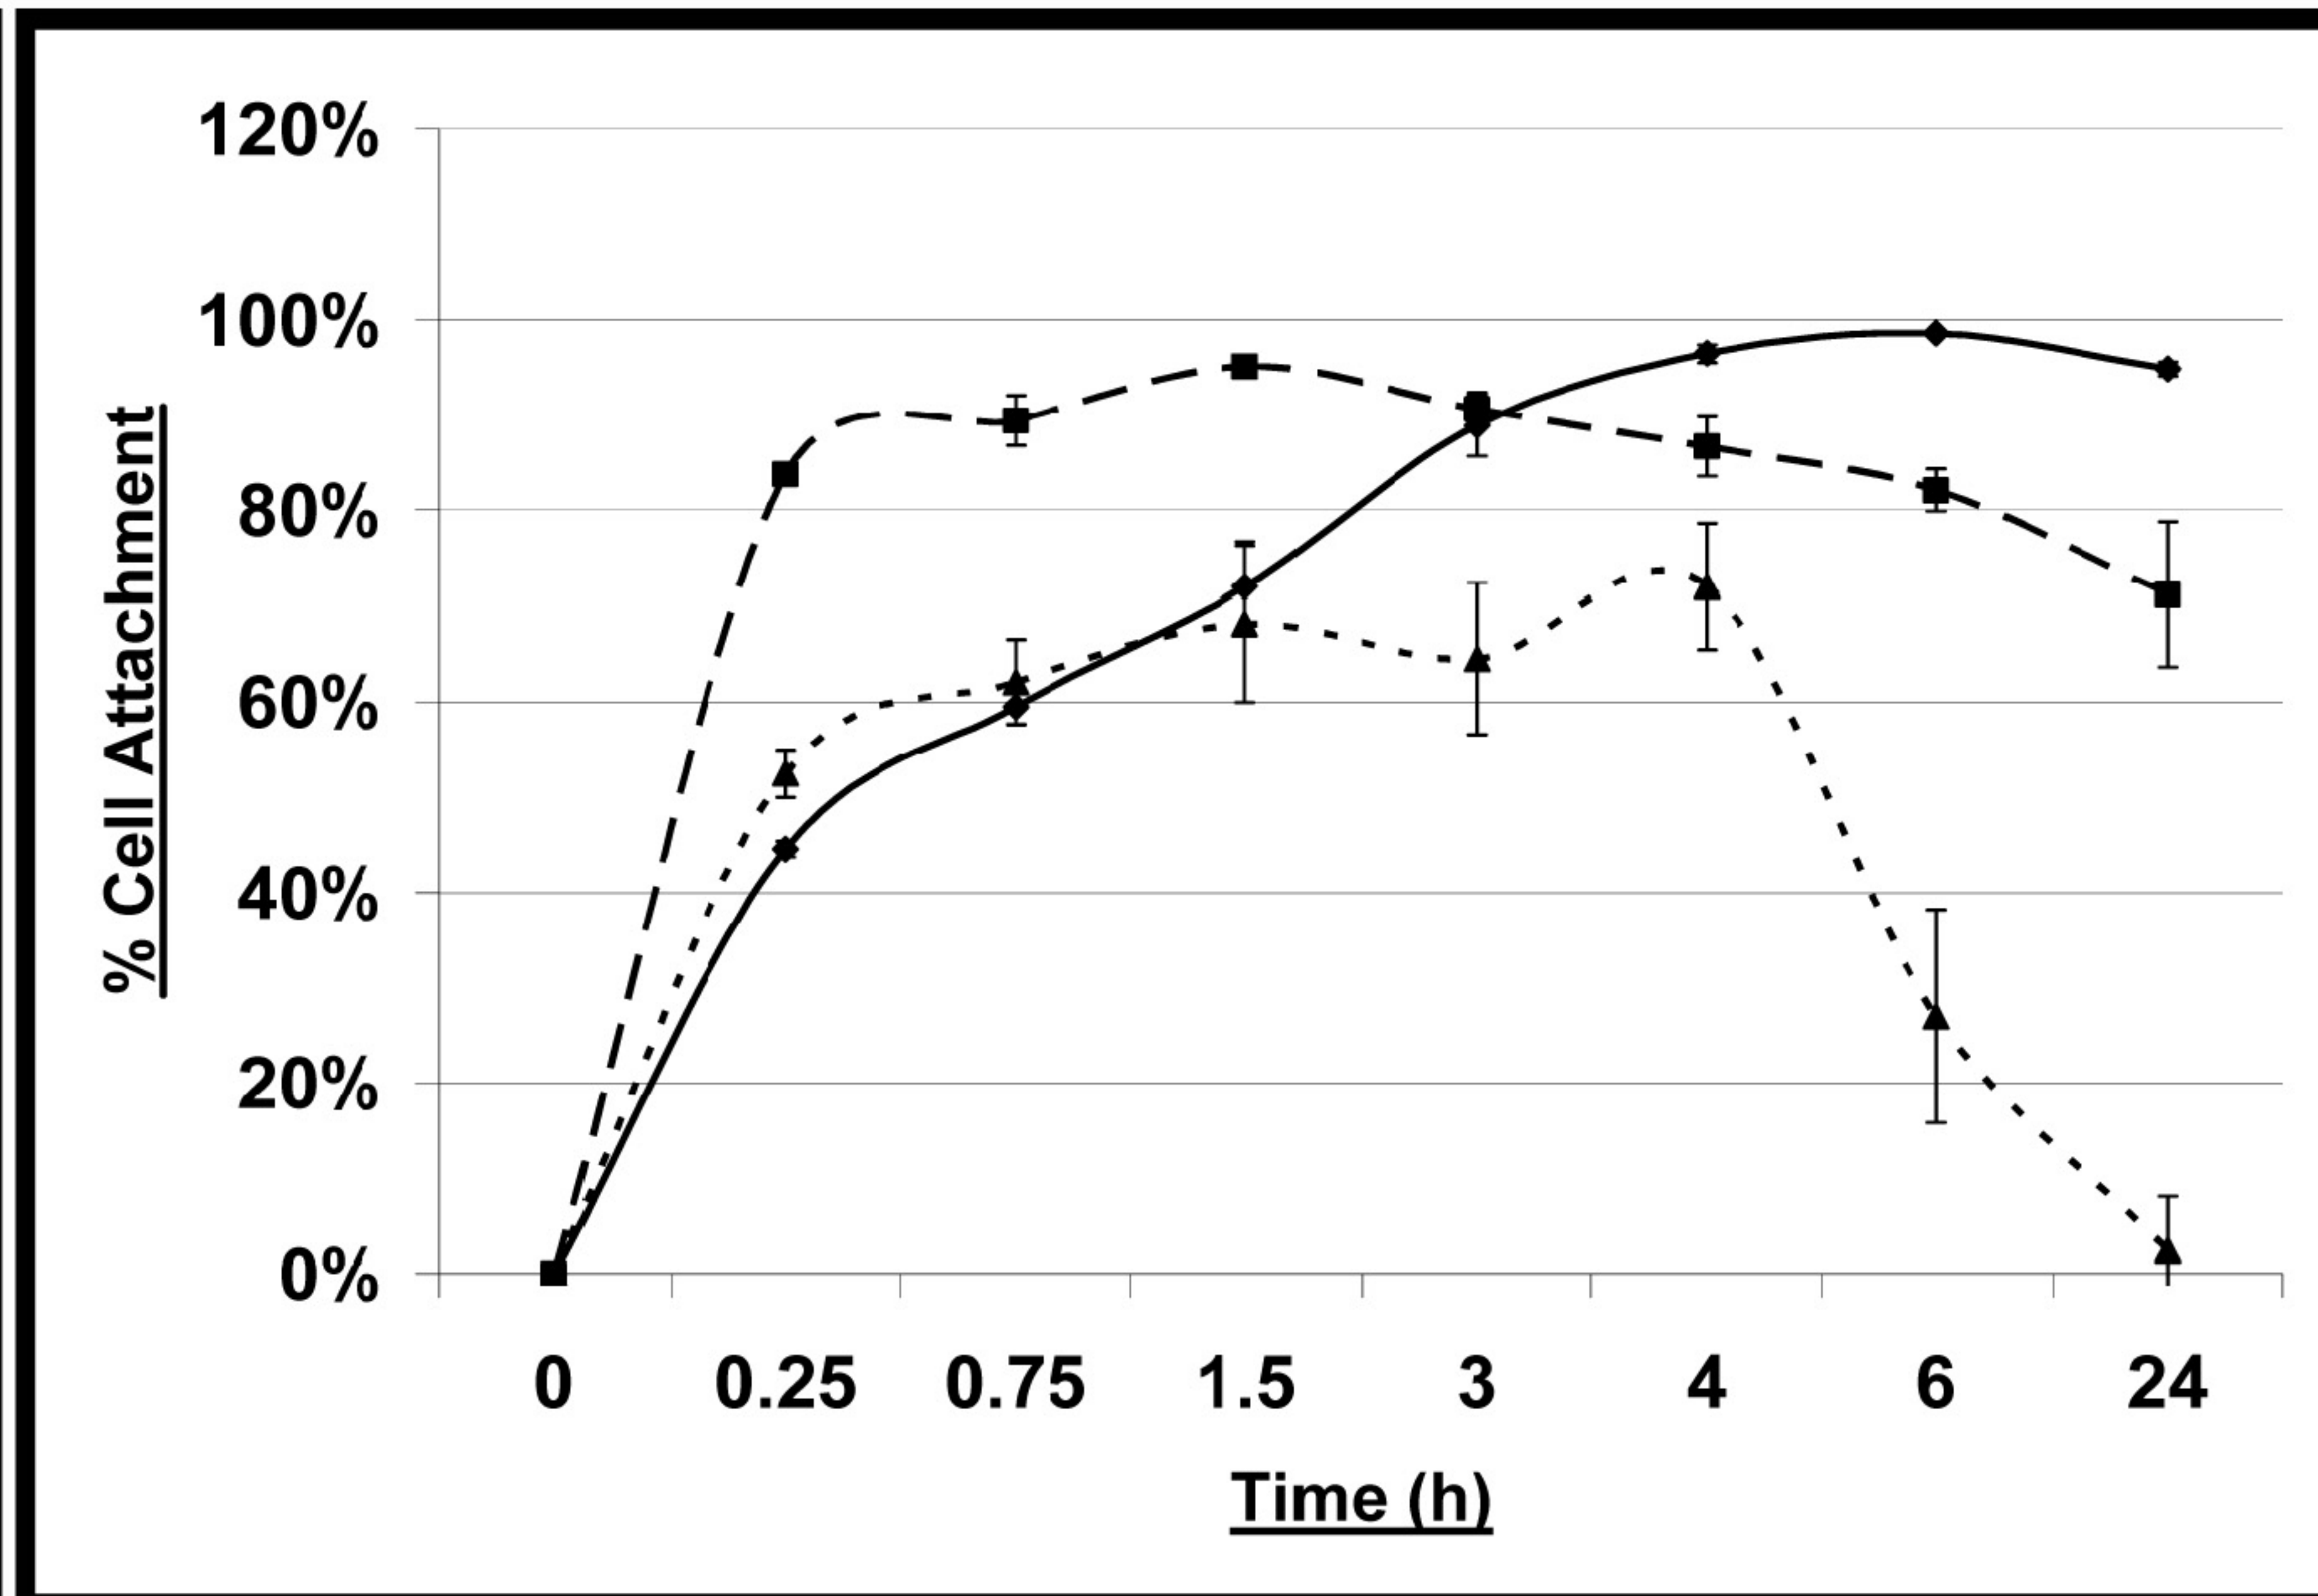

Supplement: NIHMS188281-supplement-Supp_Fig_1.pdf [file NIHMS188281-supplement-Supp_Fig_1.pdf]

# Supplemental Figure 2:

## MDA-436

N=2

N=3

Uncoated

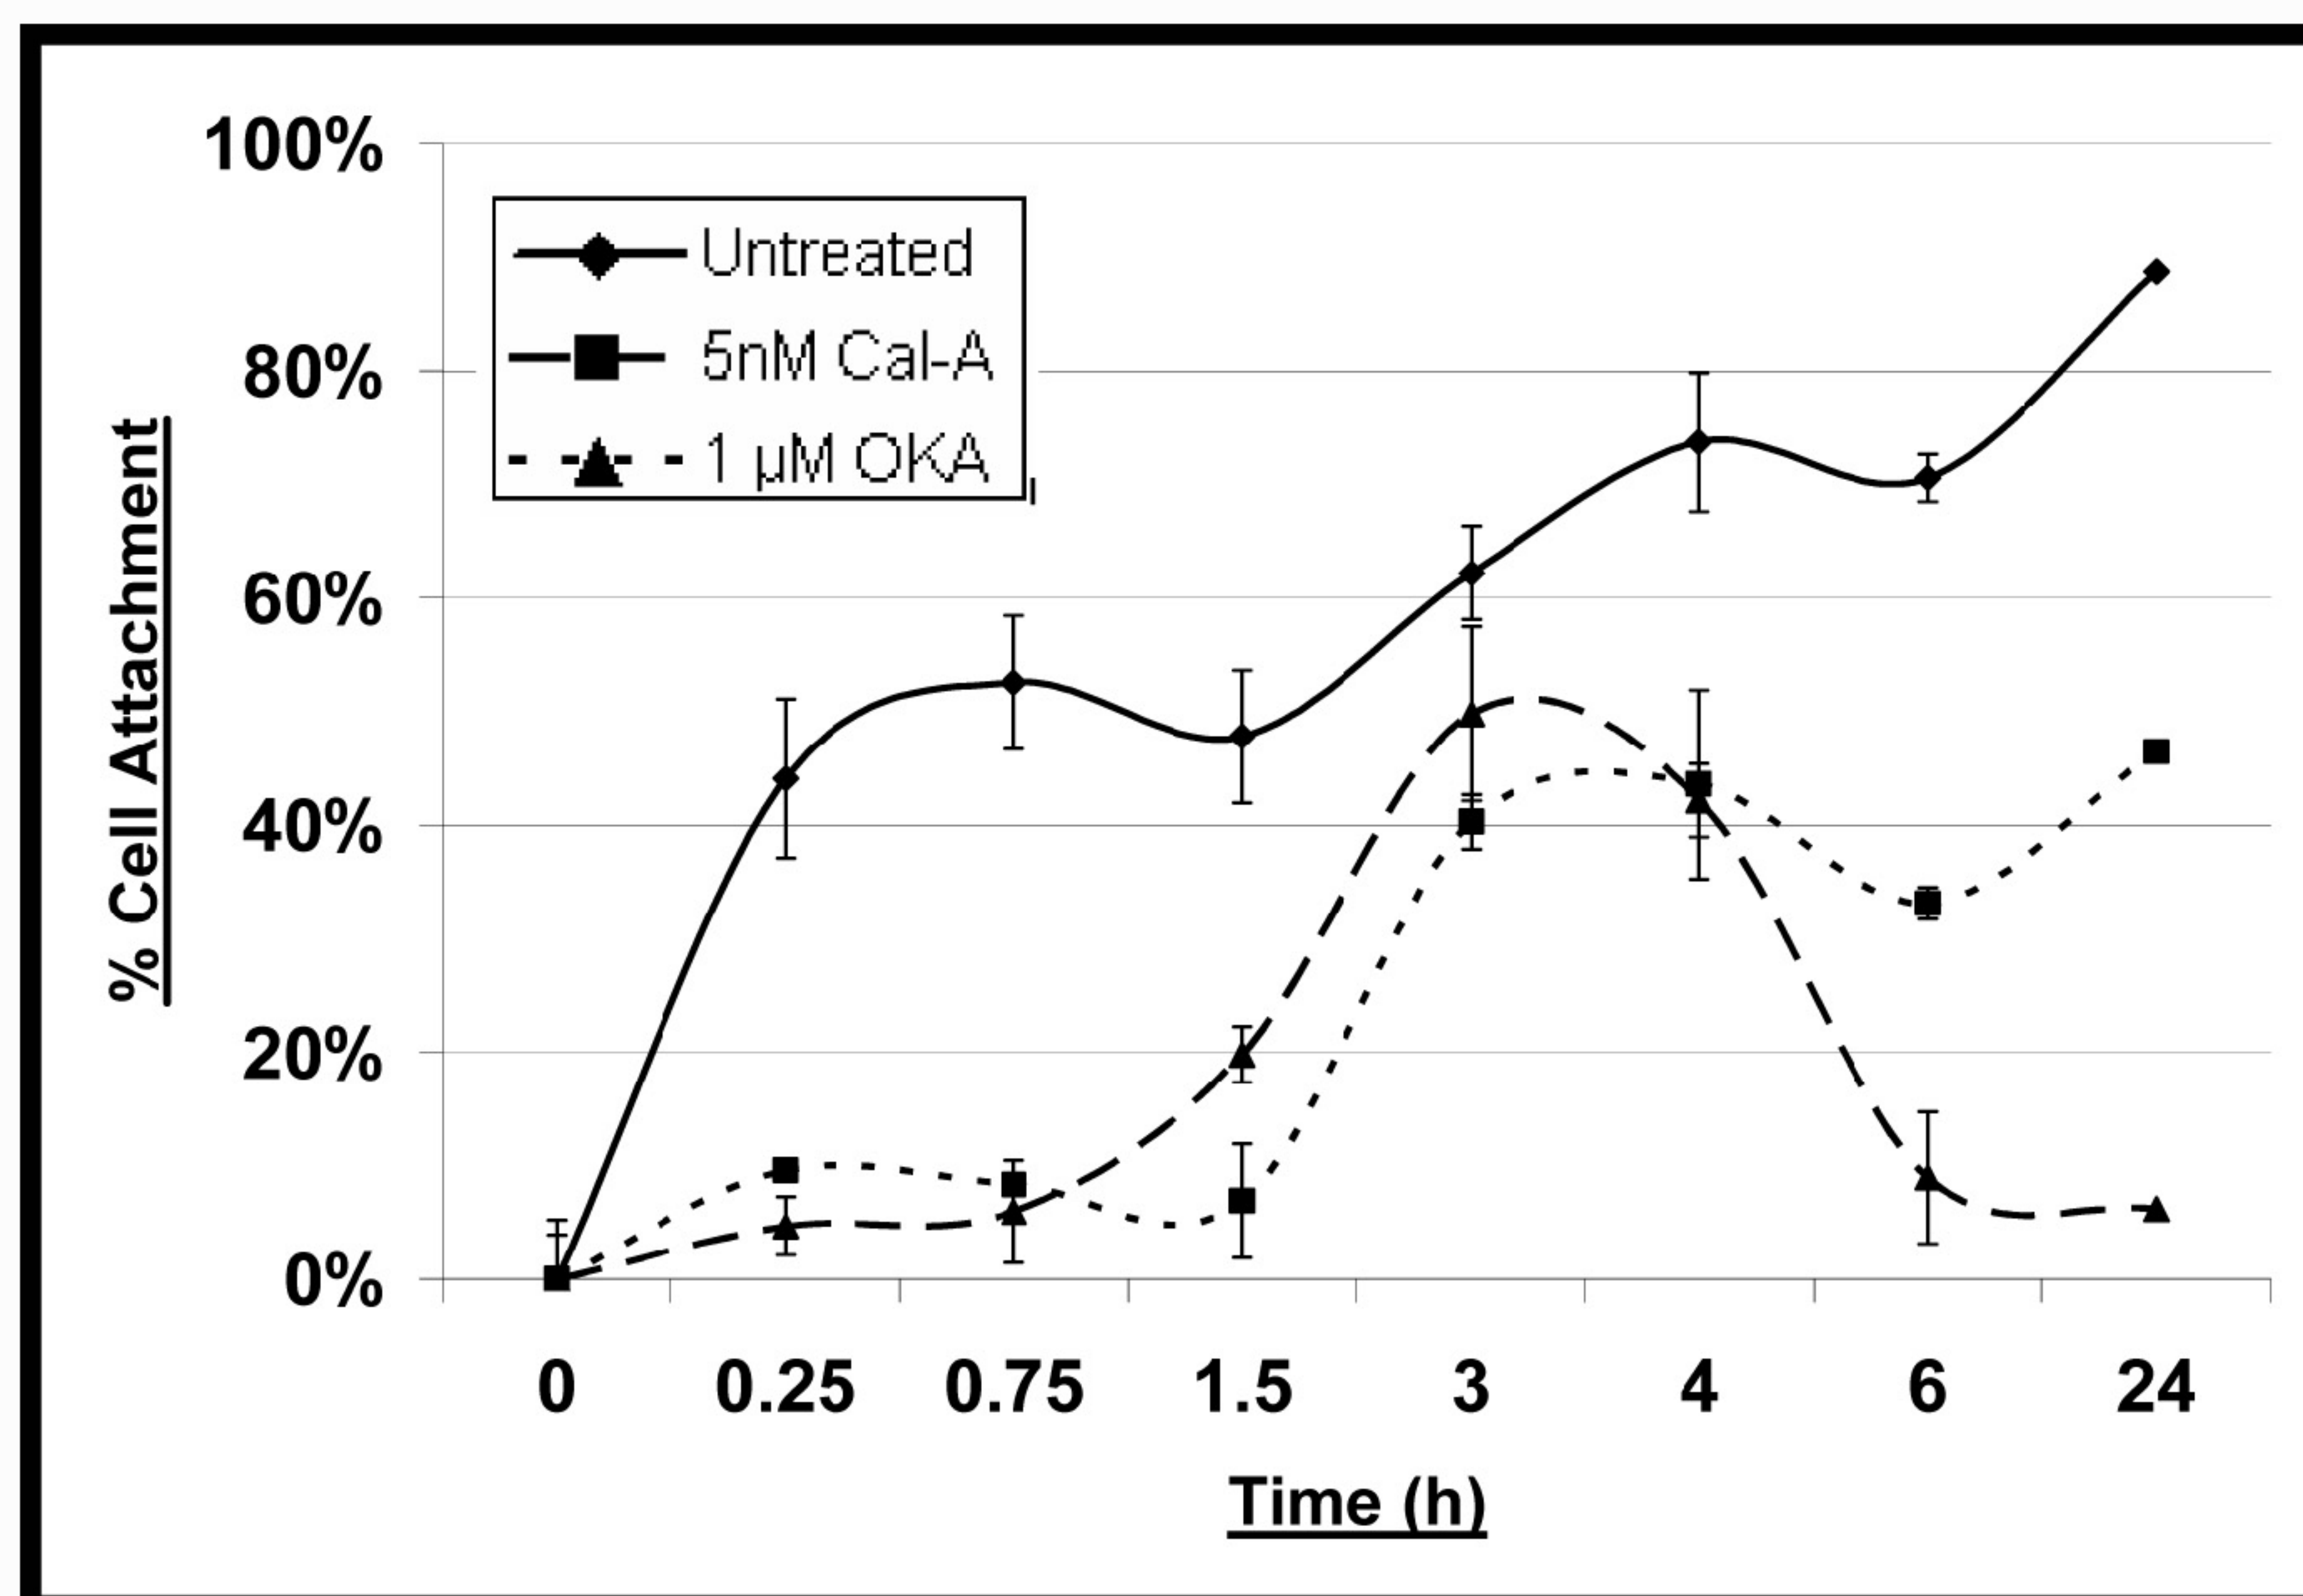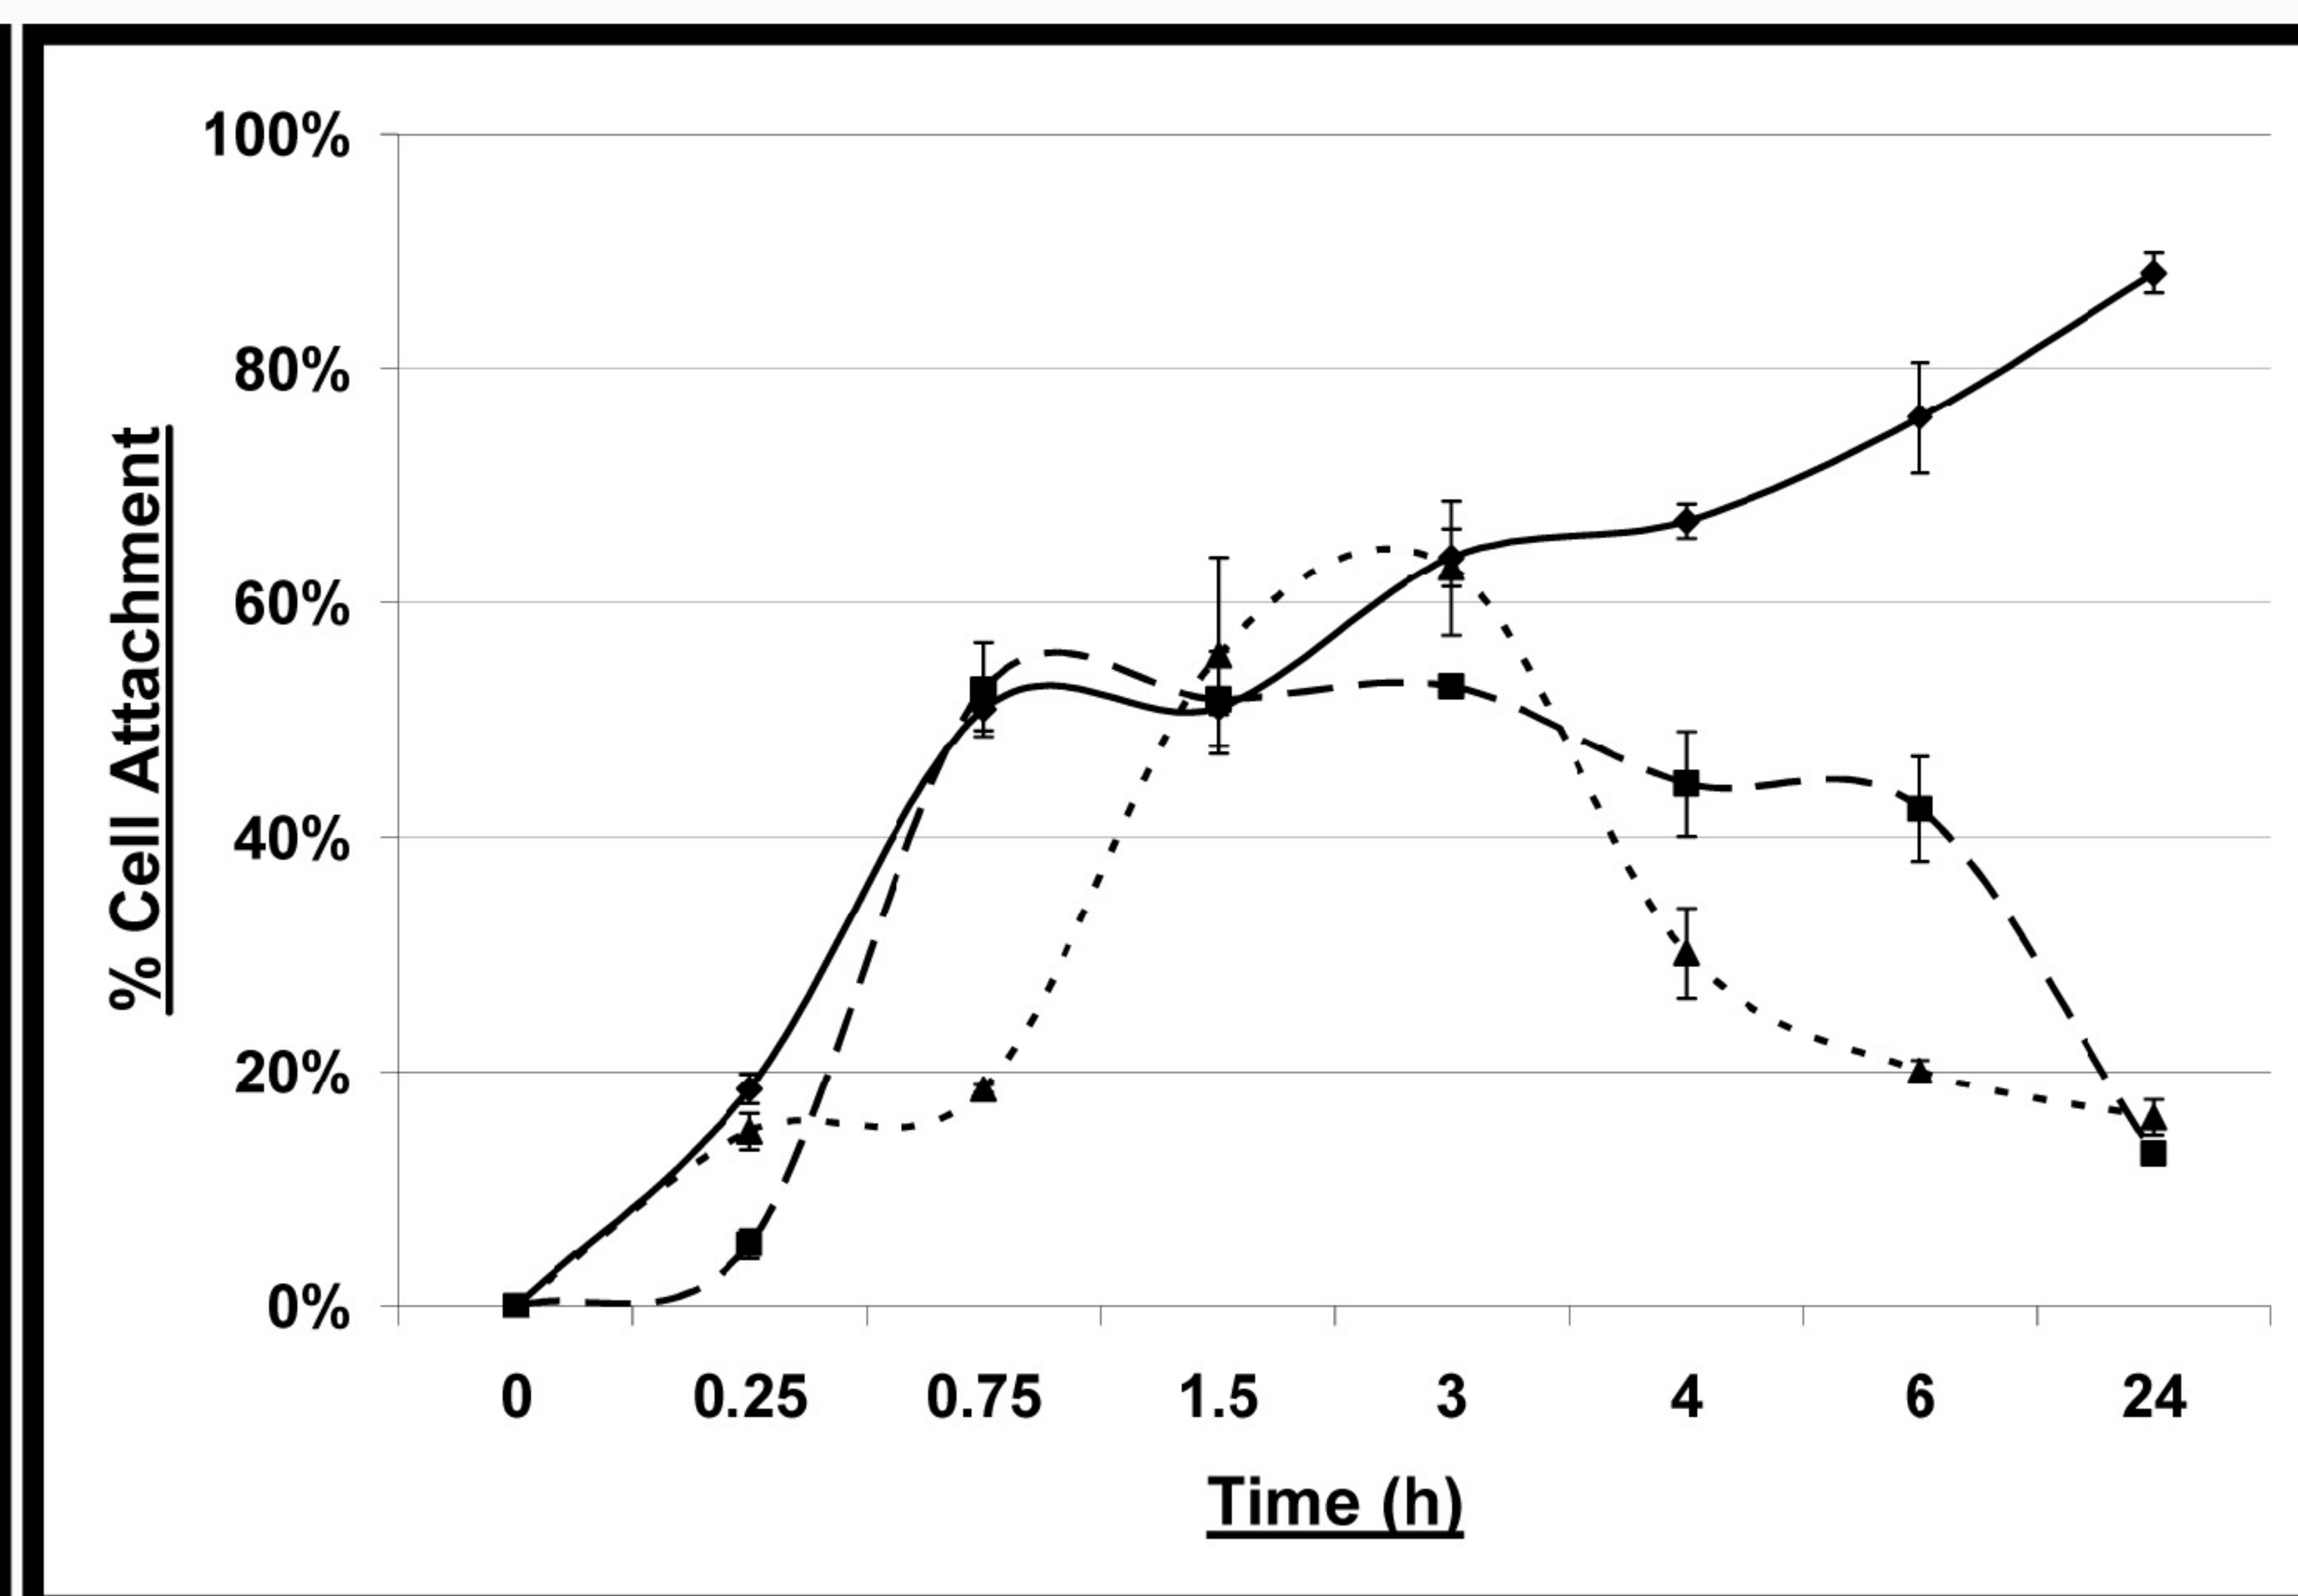

Laminin

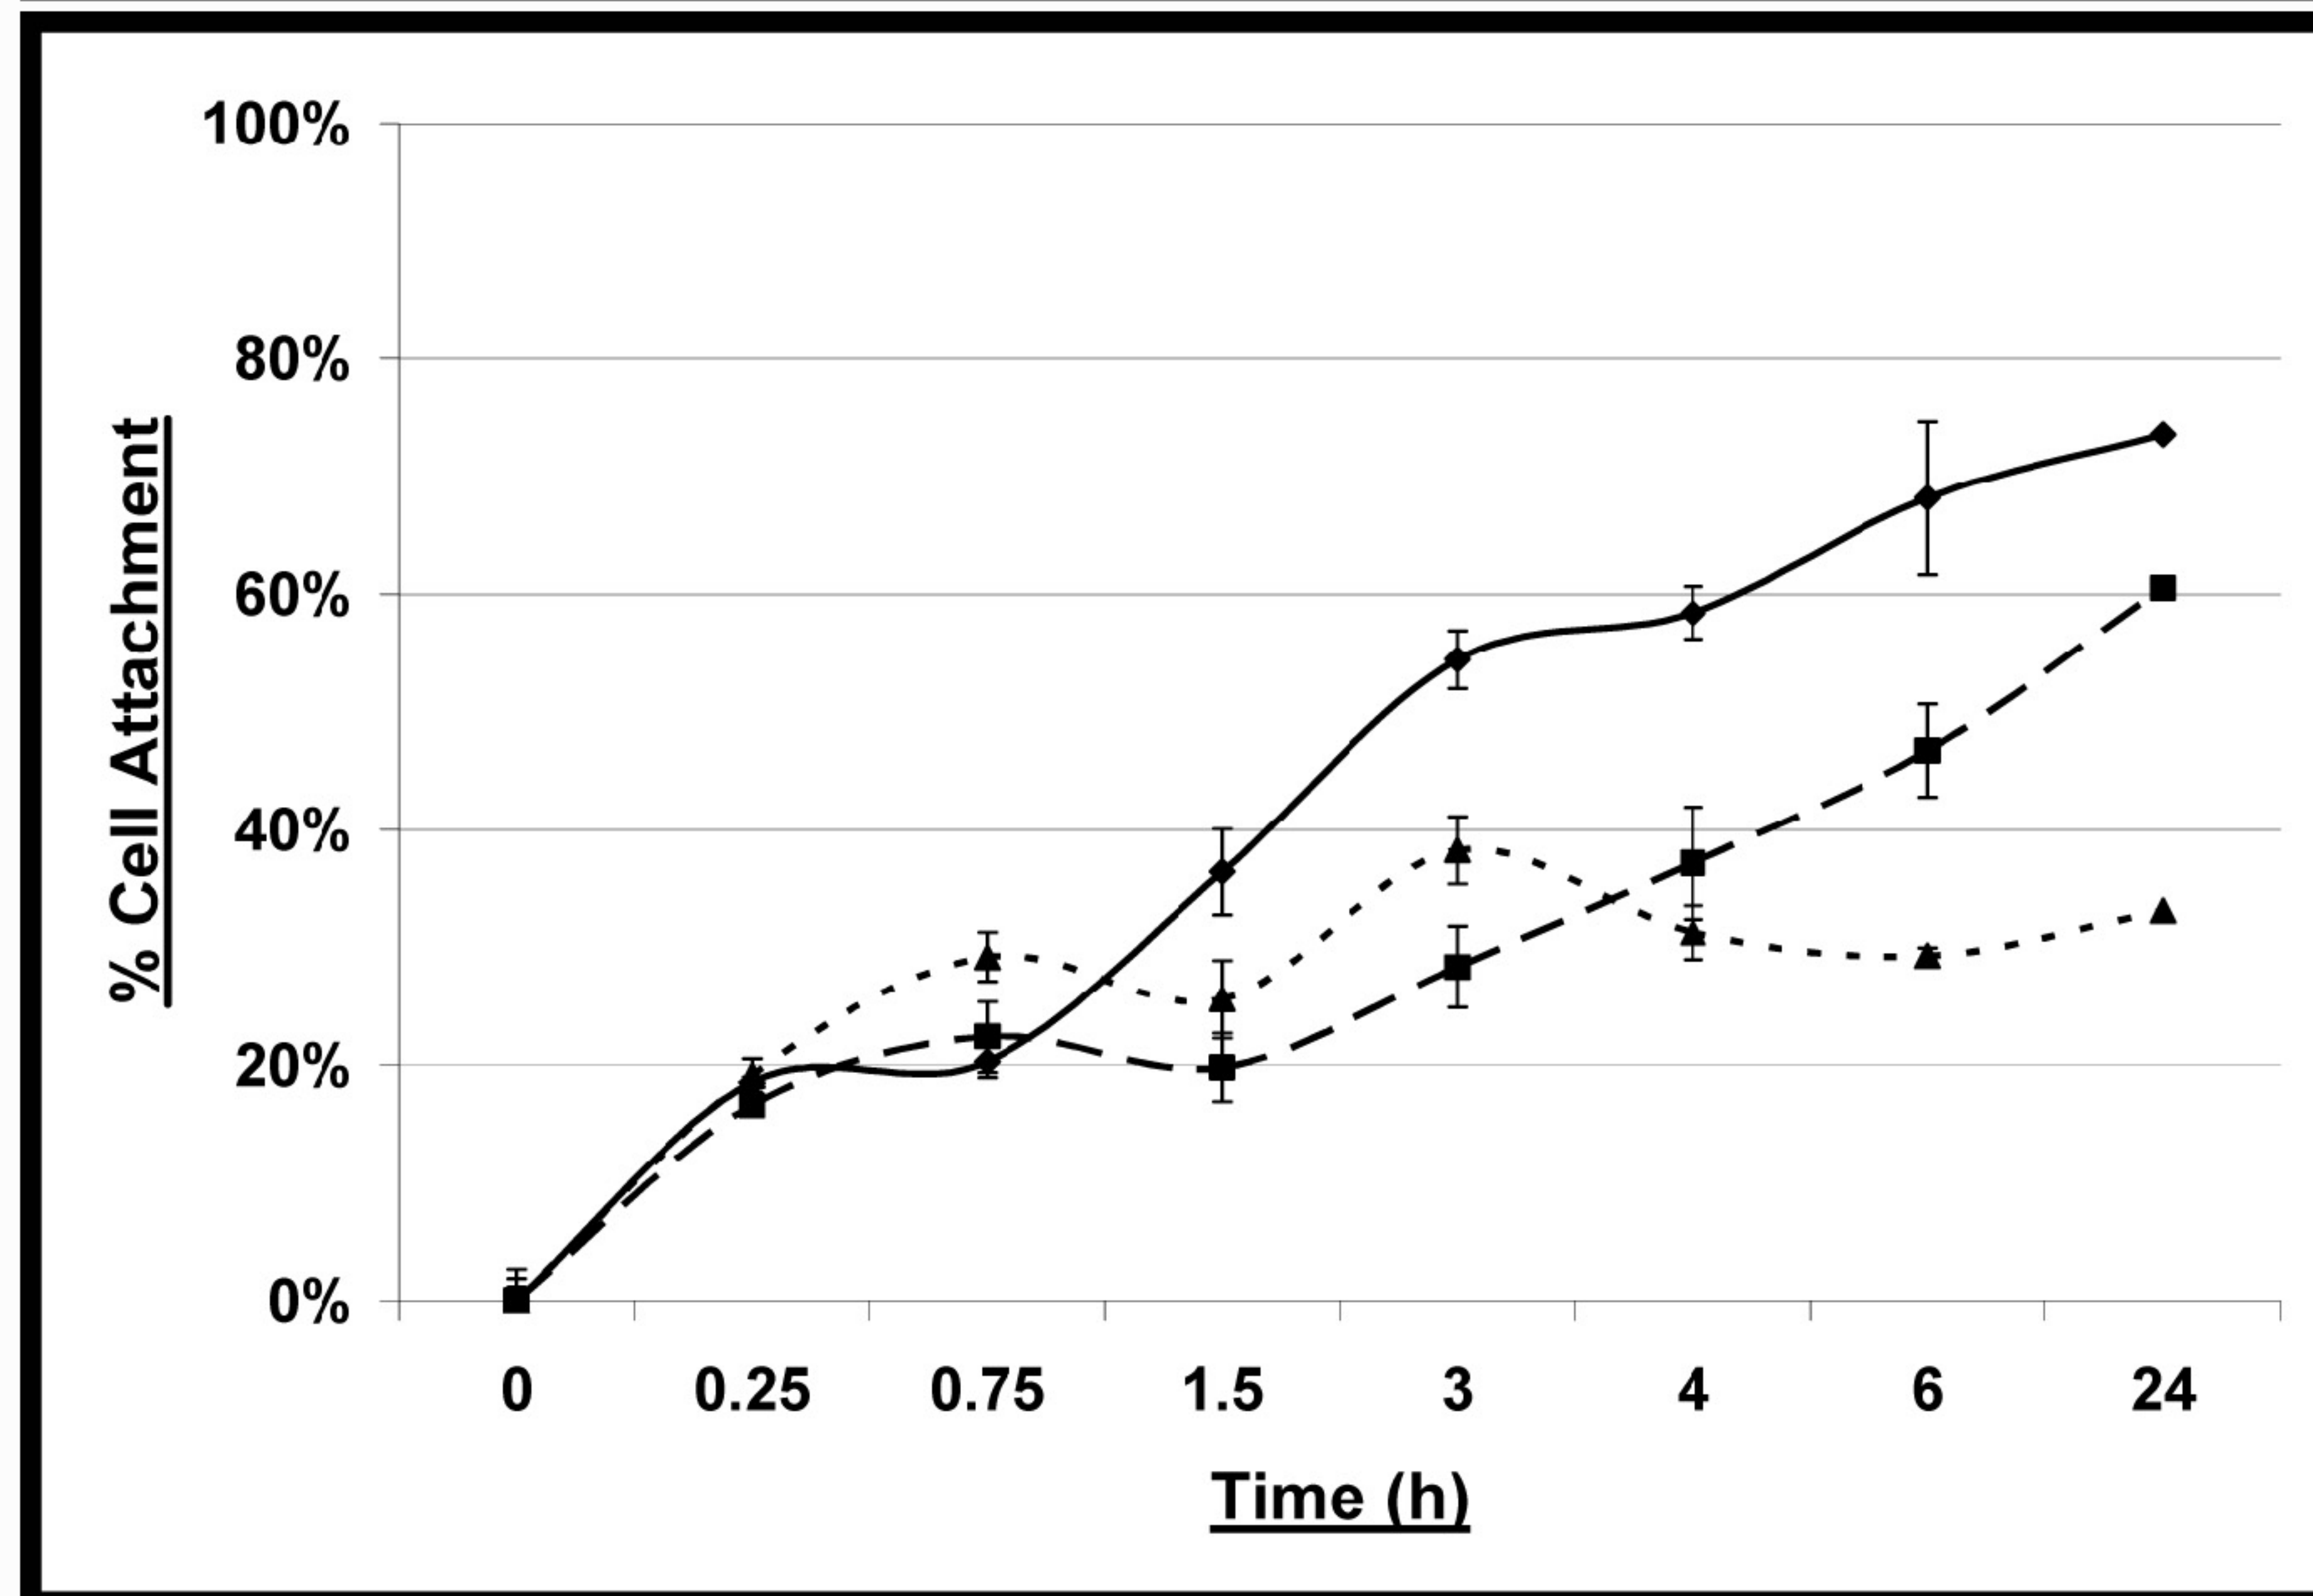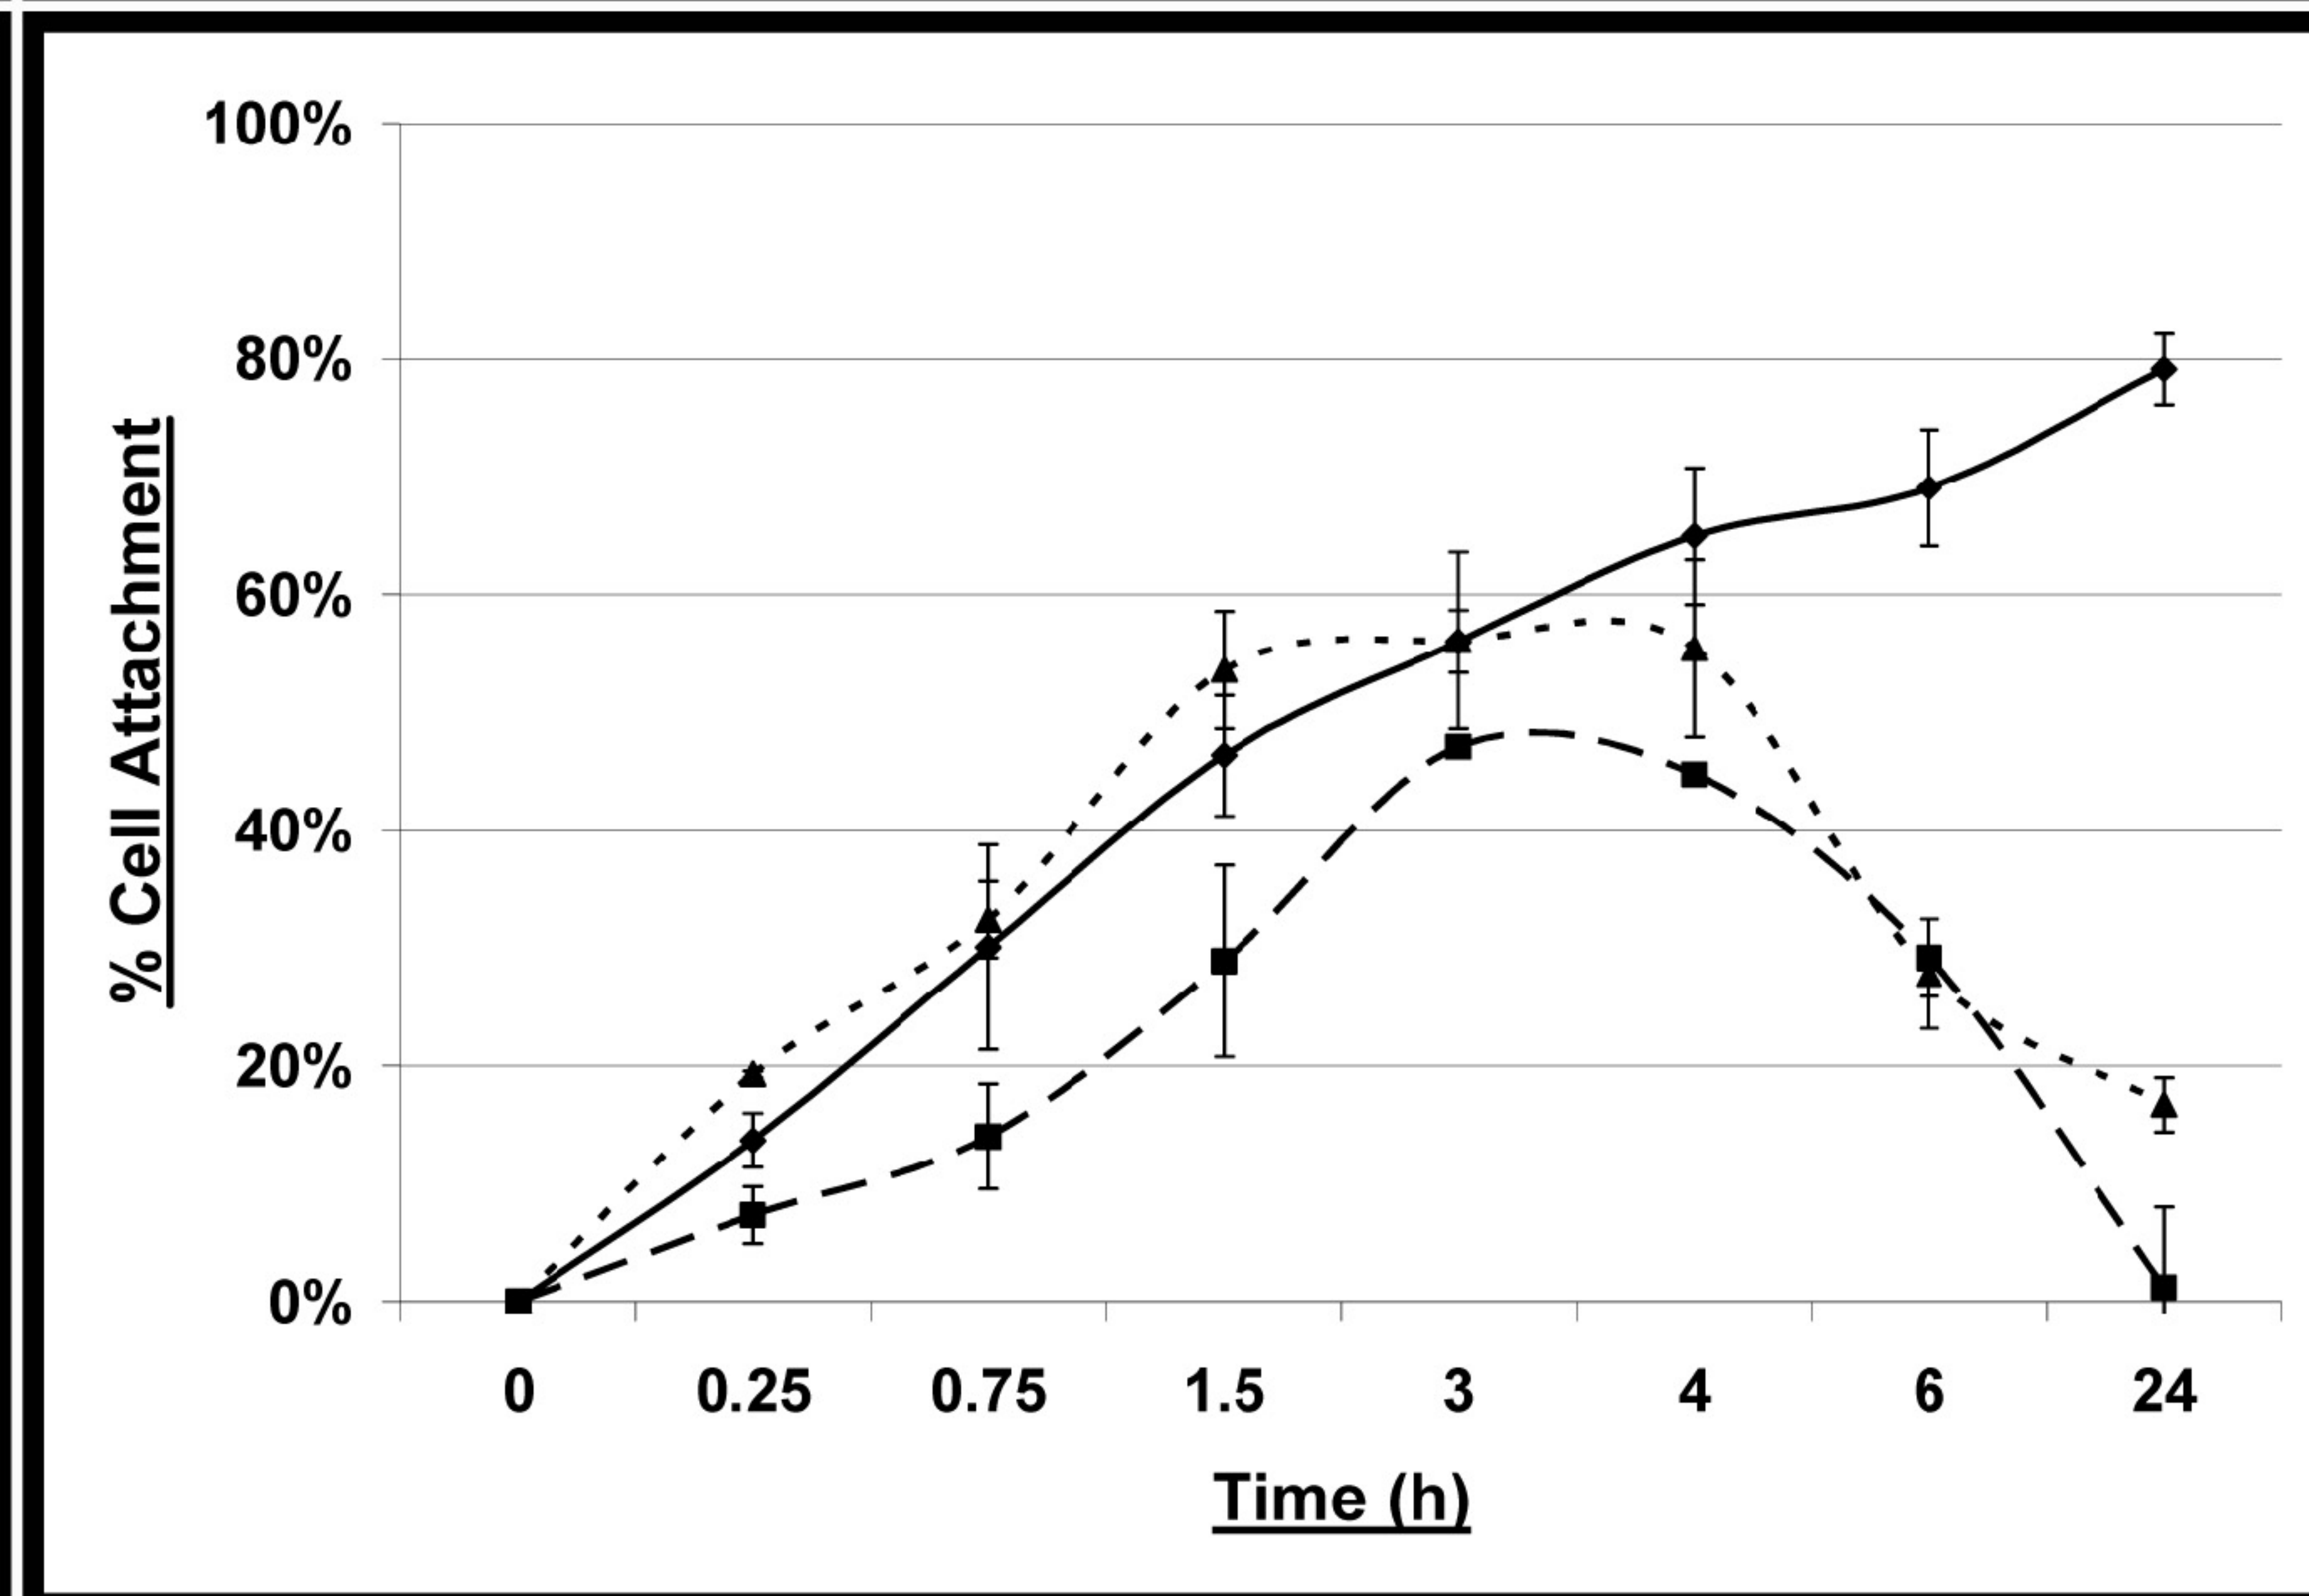

Supplement: NIHMS188281-supplement-Supp_Fig_2.pdf [file NIHMS188281-supplement-Supp_Fig_2.pdf]

# Supplemental Figure 3:

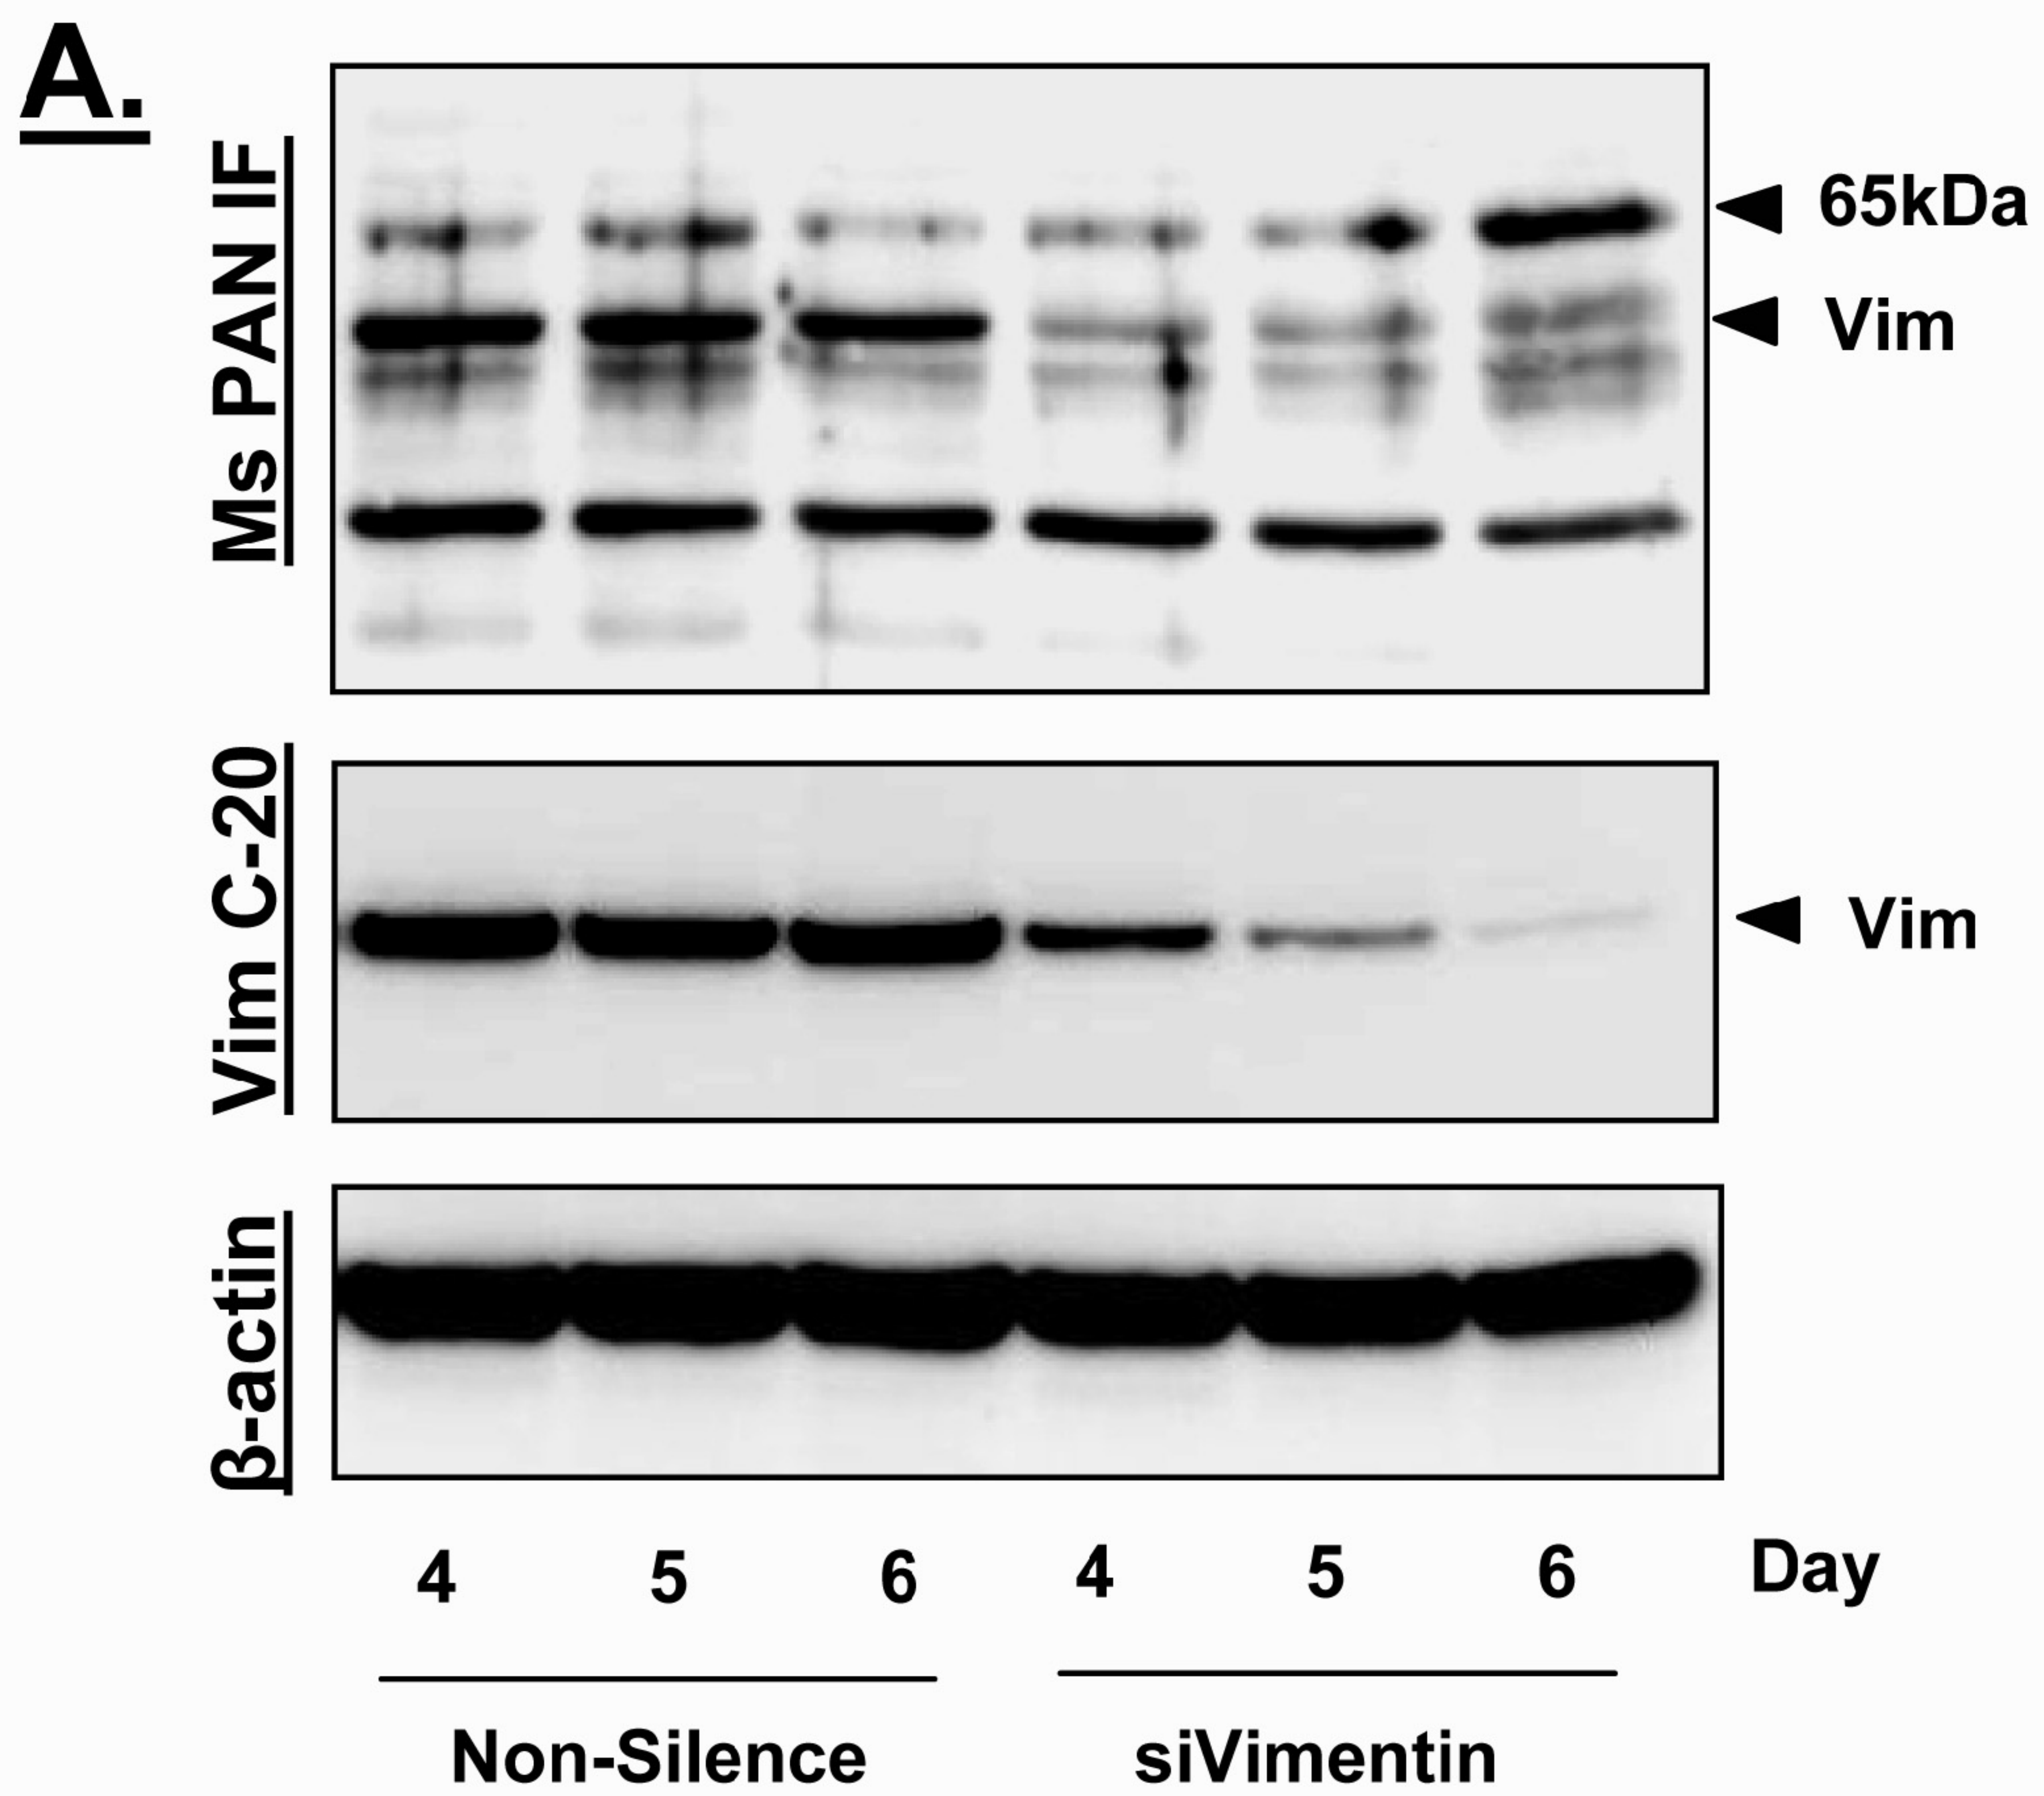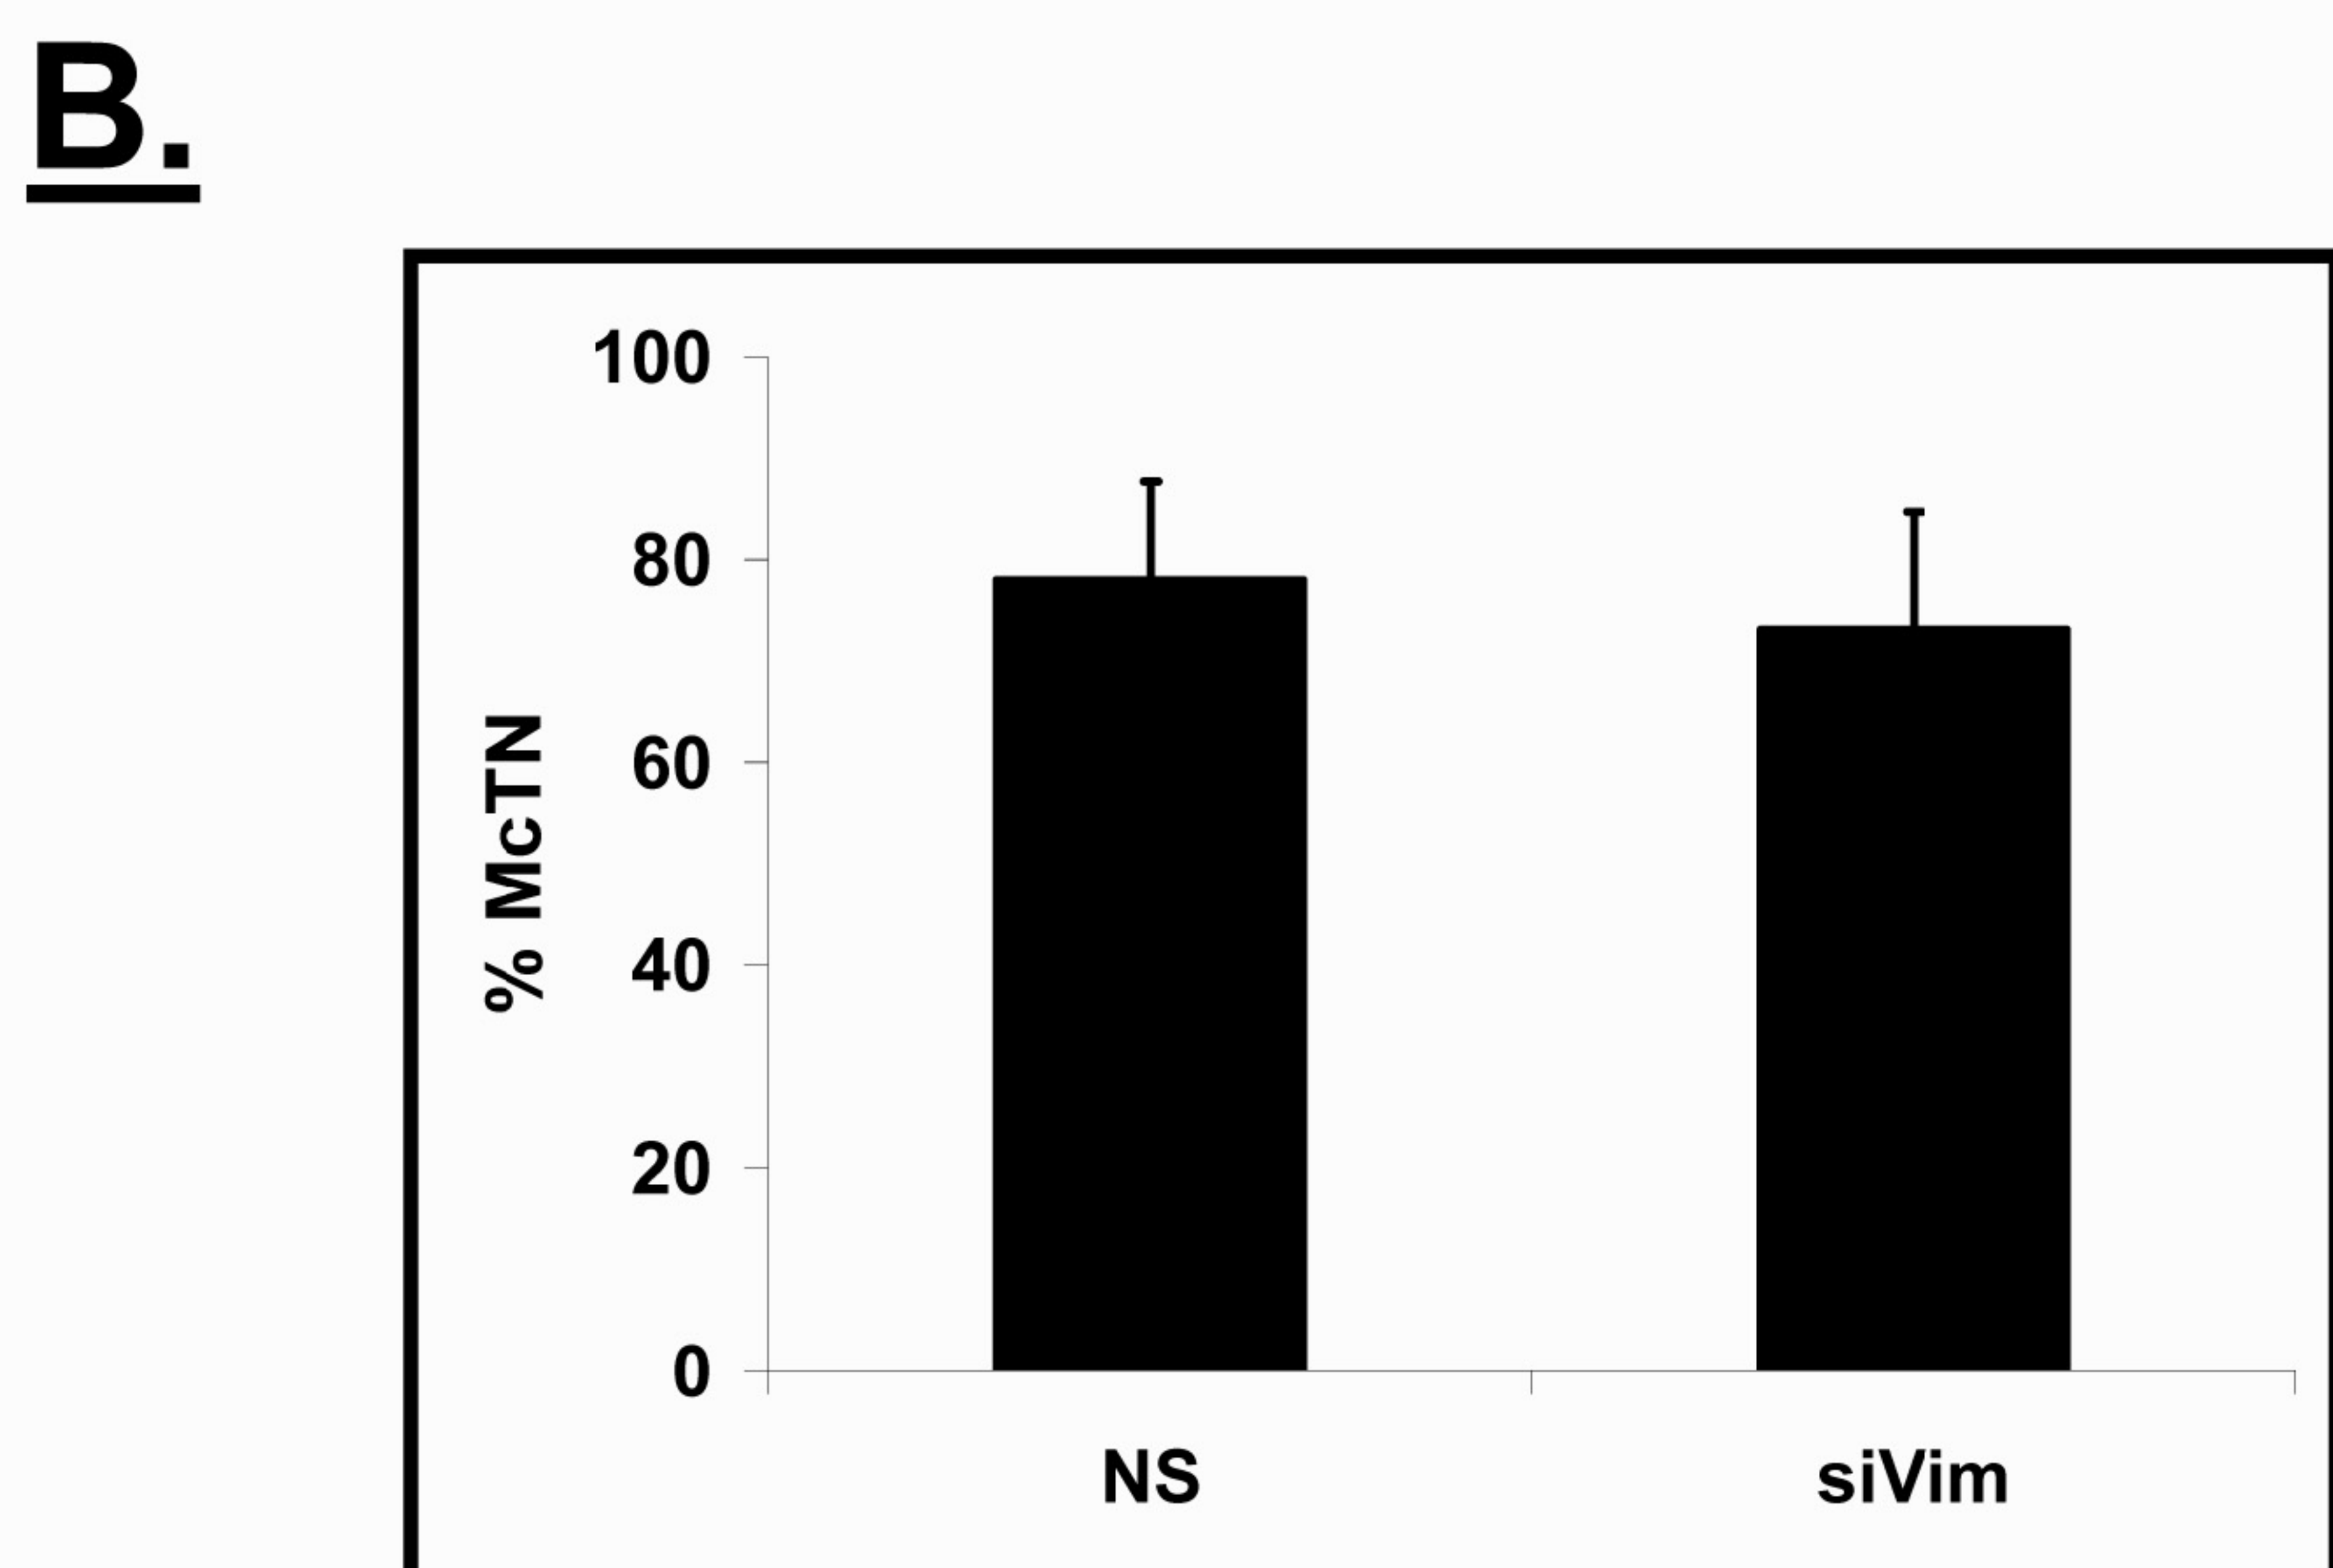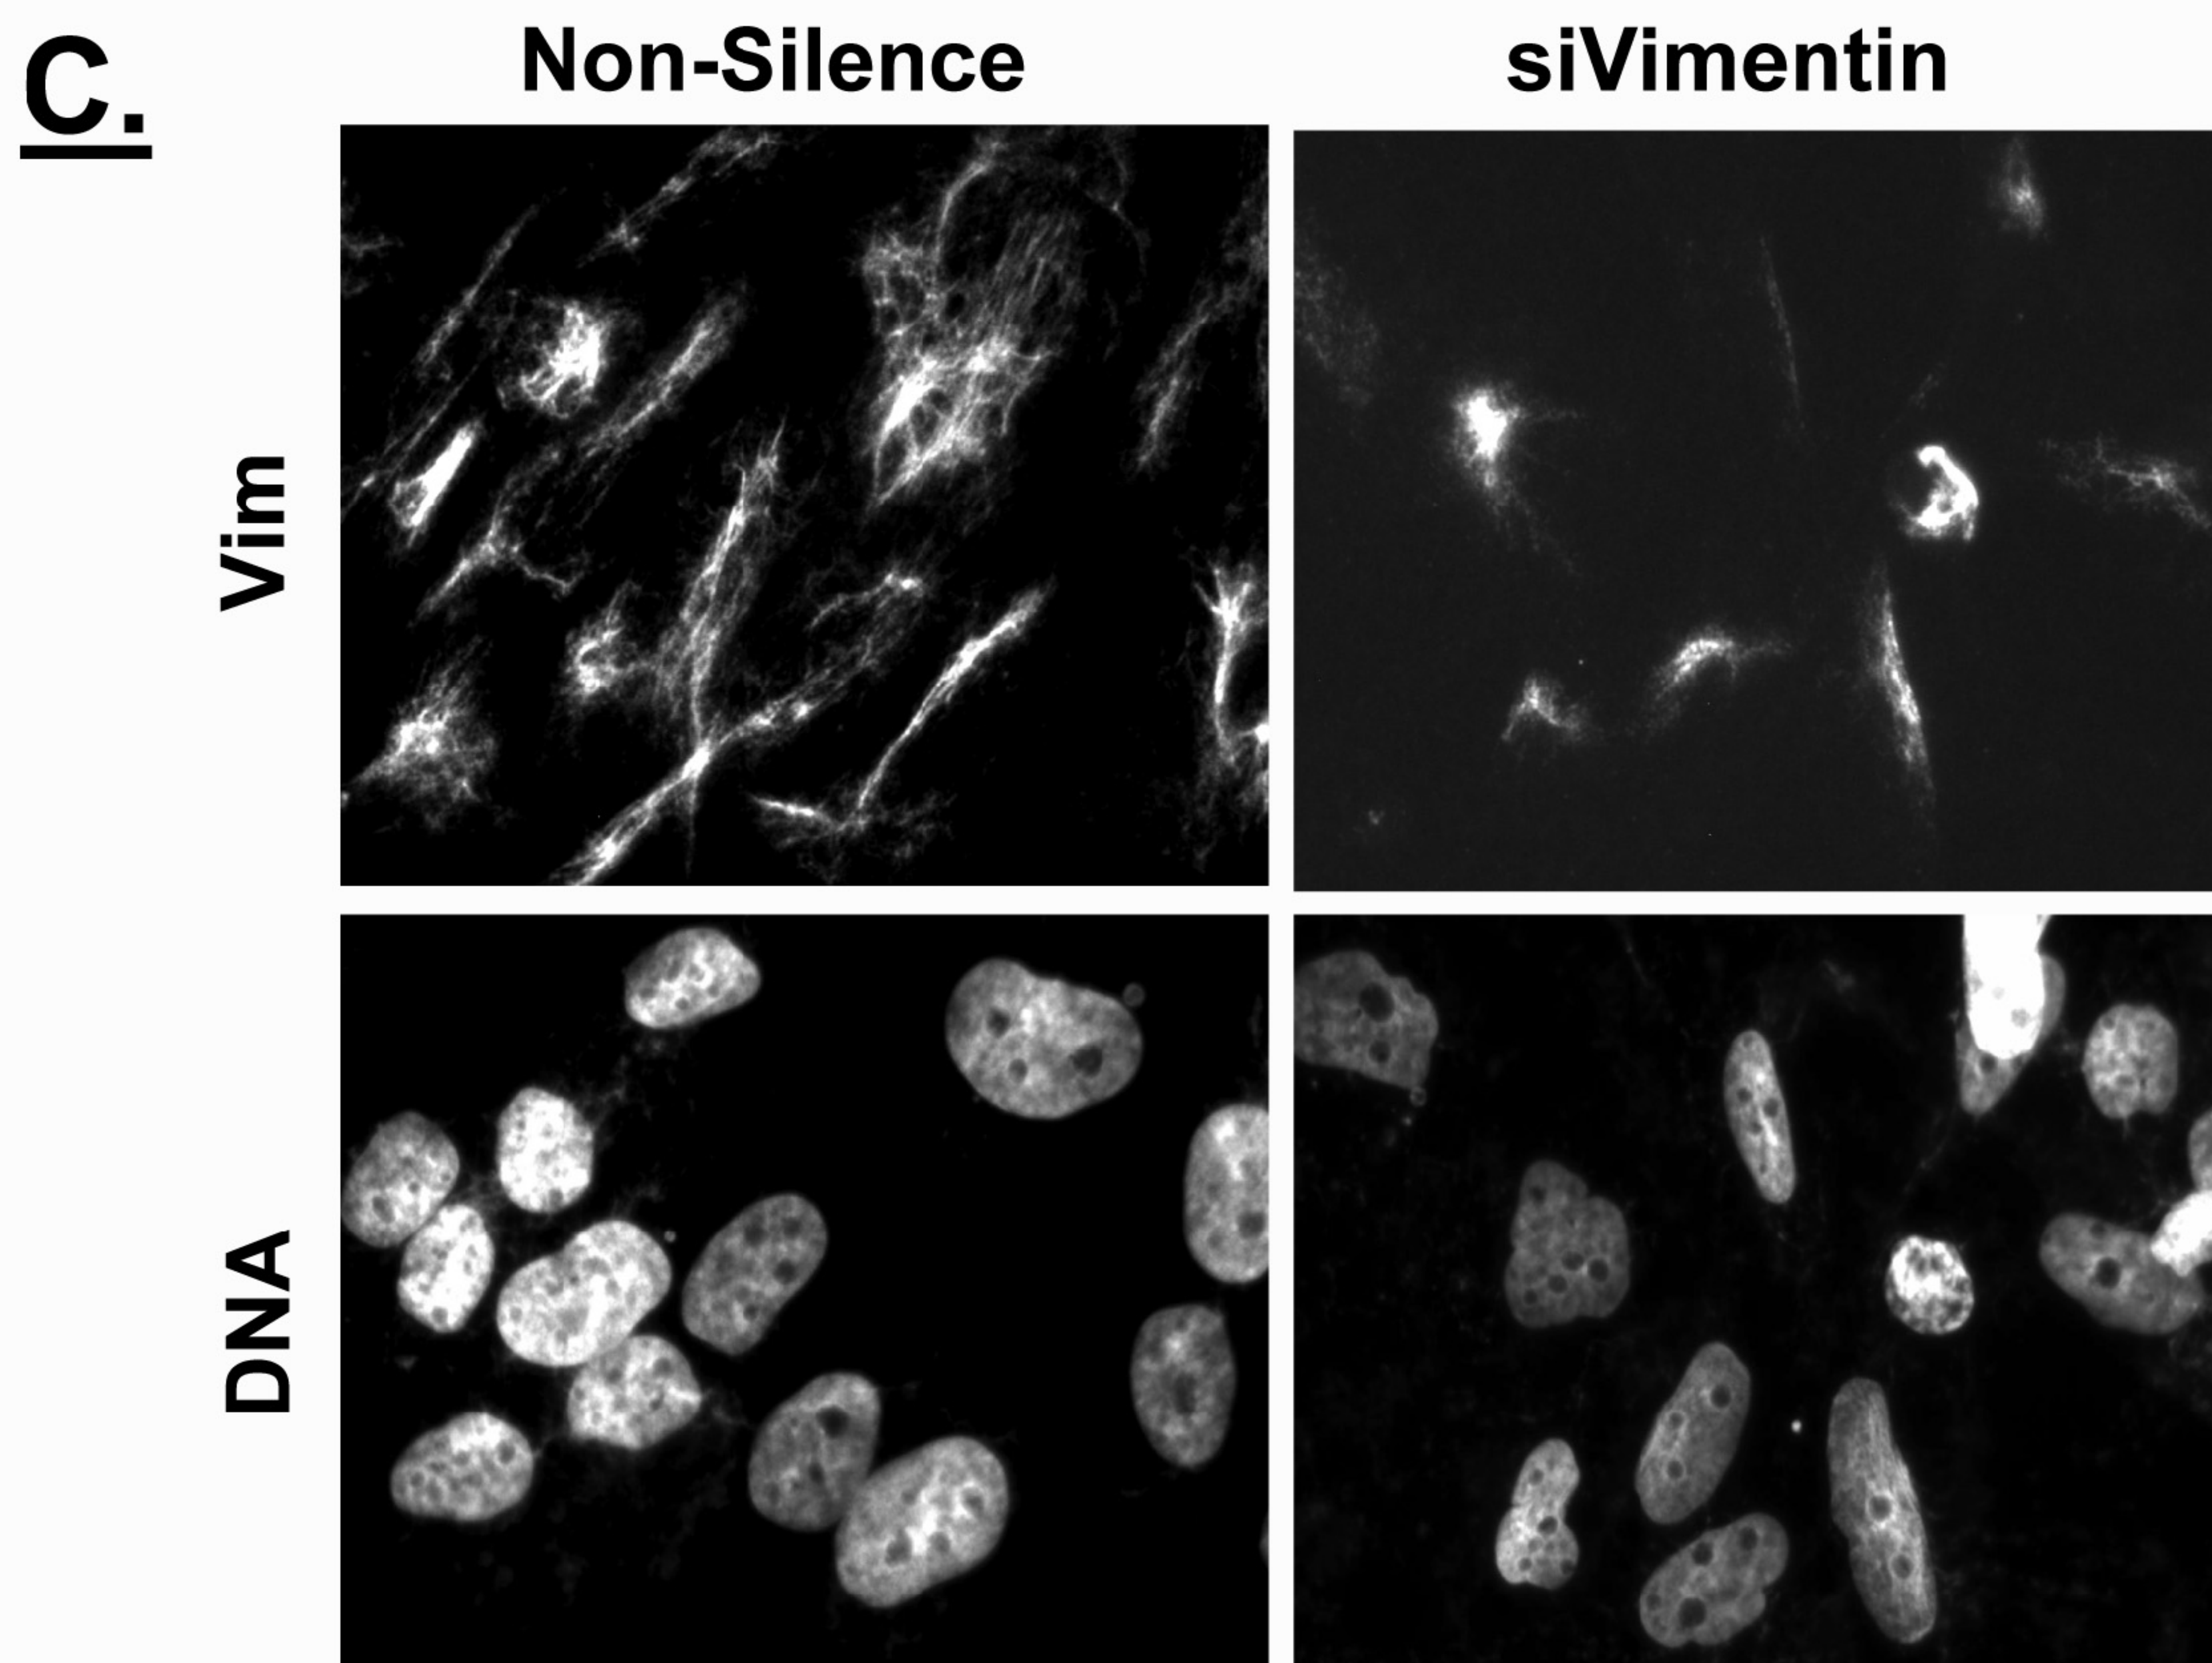

Supplement: NIHMS188281-supplement-Supp_Fig_3.pdf [file NIHMS188281-supplement-Supp_Fig_3.pdf]
